# Supplementary material for: Synthesis of highly functionalized [3]dendralenes and their Diels–Alder reactions displaying unexpected regioselectivity
Source: Royal Society of Chemistry journal article supplement (doi:10.1039/c6ra01729k), 2016-01-01

***SUPPORTING INFORMATION FOR:***

**Synthesis of highly functionalized [3]dendralenes and their Diels-  
Alder reaction displaying unexpected regioselectivity**

**Gonna Somu Naidu<sup>a</sup>, Rekha Singh<sup>a</sup>, Mukesh Kumar<sup>b</sup> and Sunil K. Ghosh<sup>\*a</sup>**

<sup>a</sup> Bio-Organic Division

<sup>b</sup> Solid State Physics Division

Bhabha Atomic Research Centre, Trombay, Mumbai 400085, India

<sup>\*</sup> Corresponding author

Tel: +91-22-25595012; Fax: +91-22-25505151

E-mail: ghsunil@barc.gov.in

## TABLE OF CONTENTS

| Sl No. | Contents                                            | Page No. |
|--------|-----------------------------------------------------|----------|
| 1      | X-ray Crystallographic Studies                      | 4        |
| 2      | X-ray Crystallographic Data                         | 4        |
| 3      | X-ray Crystal Structures                            | 5-7      |
| 4      | References                                          | 7        |
| 5      | $^1\text{H}$ and $^{13}\text{C}$ NMR of <b>14a</b>  | 8        |
| 6      | $^1\text{H}$ and $^{13}\text{C}$ NMR of <b>14b</b>  | 9        |
| 7      | $^1\text{H}$ and $^{13}\text{C}$ NMR of <b>14c</b>  | 10       |
| 8      | $^1\text{H}$ and $^{13}\text{C}$ NMR of <b>13a</b>  | 11       |
| 9      | $^1\text{H}$ and $^{13}\text{C}$ NMR of <b>13b</b>  | 12       |
| 10     | $^1\text{H}$ and $^{13}\text{C}$ NMR of <b>13c</b>  | 13       |
| 11     | $^1\text{H}$ and $^{13}\text{C}$ NMR of <b>12a</b>  | 14       |
| 12     | $^{31}\text{P}$ NMR of <b>12a</b>                   | 15       |
| 13     | $^1\text{H}$ and $^{13}\text{C}$ NMR of <b>12b</b>  | 16       |
| 14     | $^{31}\text{P}$ NMR of <b>12b</b>                   | 17       |
| 15     | $^1\text{H}$ and $^{13}\text{C}$ NMR of <b>12c</b>  | 18       |
| 16     | $^{31}\text{P}$ NMR of <b>12c</b>                   | 19       |
| 17     | $^1\text{H}$ NMR of <b>10</b>                       | 20       |
| 18     | $^1\text{H}$ and $^{13}\text{C}$ NMR of <b>11a</b>  | 21       |
| 19     | $^1\text{H}$ and $^{13}\text{C}$ NMR of <b>11b</b>  | 22       |
| 20     | $^1\text{H}$ and $^{13}\text{C}$ NMR of <b>11c</b>  | 23       |
| 21     | $^1\text{H}$ and $^{13}\text{C}$ NMR of <b>11d</b>  | 24       |
| 22     | $^1\text{H}$ and $^{13}\text{C}$ NMR of <b>11ea</b> | 25       |
| 23     | $^1\text{H}$ and $^{13}\text{C}$ NMR of <b>11eb</b> | 26       |
| 24     | $^1\text{H}$ and $^{13}\text{C}$ NMR of <b>11f</b>  | 27       |

| <b>Sl No.</b> | <b>Contents</b>                                             | <b>Page No.</b> |
|---------------|-------------------------------------------------------------|-----------------|
| 25            | $^1\text{H}$ and $^{13}\text{C}$ NMR of <b>11g</b>          | 28              |
| 26            | $^1\text{H}$ and $^{13}\text{C}$ NMR of <b>11h</b>          | 29              |
| 27            | $^1\text{H}$ and $^{13}\text{C}$ NMR of <b>11i</b>          | 30              |
| 28            | $^1\text{H}$ and $^{13}\text{C}$ NMR of <b>11j</b>          | 31              |
| 29            | $^1\text{H}$ and $^{13}\text{C}$ NMR of <b>11k</b>          | 32              |
| 30            | $^1\text{H}$ and $^{13}\text{C}$ NMR of <b>11l</b>          | 33              |
| 31            | $^1\text{H}$ and $^{13}\text{C}$ NMR of <b>15</b>           | 34              |
| 32            | $^1\text{H}$ and $^{13}\text{C}$ NMR of <b>16</b>           | 35              |
| 33            | $^1\text{H}$ and $^{13}\text{C}$ NMR of <b>17 &amp; 18</b>  | 66              |
| 34            | $^1\text{H}$ / $^1\text{H}$ COSY NMR of <b>17 &amp; 18</b>  | 37-38           |
| 35            | $^1\text{H}$ / $^1\text{H}$ ROESY NMR of <b>17 &amp; 18</b> | 39-40           |
| 36            | $^1\text{H}$ and $^{13}\text{C}$ NMR of <b>19</b>           | 41              |
| 37            | $^1\text{H}$ and $^{13}\text{C}$ NMR of <b>20</b>           | 42              |
| 38            | $^1\text{H}$ / $^1\text{H}$ COSY NMR of <b>20</b>           | 43-44           |
| 39            | $^1\text{H}$ / $^1\text{H}$ ROESY NMR of <b>20</b>          | 45-66           |
| 40            | $^1\text{H}$ and $^{13}\text{C}$ NMR of <b>21</b>           | 47              |

## 1. X-ray Crystallographic Studies:

Single crystal X-ray diffraction data were collected on Agilent Supernova system equipped with a microfocus Cu-source ( $\lambda = 1.5418 \text{ \AA}$ ) and a Titan CCD detector. The crystals were separated, coated with paraffin oil and mounted on a loop for X-ray diffraction data collection at specified temperature. The data reduction and analysis were carried out with CrysAlisPro software suit. Analytical absorption correction using a multifaceted crystal model based on expressions derived by Clark & Reid<sup>1</sup> and as implemented in the CrysAlisPro software suit was carried out for both the crystals. The structures were solved by direct method using Shelxs and refined using Shelxl softwares<sup>2</sup> using Olex2 interface<sup>3</sup>. All the nonhydrogen atoms were refined anisotropically and hydrogens were generated at their idealized positions and refined isotropically according to riding model.

## 2. X-ray Crystallographic Data (Table 1):

| Compounds                                 | 11a                                            | 15                                                | 16                                                  | 19                                              |
|-------------------------------------------|------------------------------------------------|---------------------------------------------------|-----------------------------------------------------|-------------------------------------------------|
| Formula                                   | C <sub>29</sub> H <sub>28</sub> O <sub>3</sub> | C <sub>34</sub> H <sub>32</sub> BrNO <sub>5</sub> | C <sub>33</sub> H <sub>29</sub> BrClNO <sub>4</sub> | C <sub>26</sub> H <sub>27</sub> NO <sub>4</sub> |
| Formula Wt                                | 424.51                                         | 614.51                                            | 618.93                                              | 417.48                                          |
| Crystal System                            | Monoclinic                                     | Monoclinic                                        | Orthorhombic                                        | Monoclinic                                      |
| Space Group                               | P2 <sub>1</sub> /n                             | P2 <sub>1</sub> /c                                | Pbca                                                | P2 <sub>1</sub> /c                              |
| T, K                                      | 293                                            | 293                                               | 150.15                                              | 293(2)                                          |
| Z                                         | 4                                              | 4                                                 | 8                                                   | 4                                               |
| a, Å                                      | 10.4846(6)                                     | 13.0988(11)                                       | 10.4479(2)                                          | 14.7213(14)                                     |
| b, Å                                      | 15.8614(8)                                     | 27.6314(14)                                       | 20.6292(3)                                          | 12.0482(10)                                     |
| c, Å                                      | 14.7350(8)                                     | 8.4212(5)                                         | 27.0817(4)                                          | 13.0935(10)                                     |
| $\alpha$ , deg                            | 90                                             | 90                                                | 90                                                  | 90                                              |
| $\beta$ , deg                             | 99.128(5)                                      | 93.631(7)                                         | 90                                                  | 109.305(11)                                     |
| $\gamma$ , deg                            | 90                                             | 90                                                | 90                                                  | 90                                              |
| V, Å <sup>3</sup>                         | 2419.4(2)                                      | 3041.8(4)                                         | 5836.97(16)                                         | 2191.8(4)                                       |
| $\rho_{\text{calc}}$ , mg/mm <sup>3</sup> | 1.165                                          | 1.342                                             | 1.409                                               | 1.265                                           |
| $\mu$ , m/mm <sup>-1</sup>                | 0.585                                          | 2.179                                             | 3.072                                               | 0.683                                           |
| $\theta$ range, deg                       | 4.123-69.930                                   | 3.199-70.246                                      | 4.29-72.13                                          | 3.181-70.164                                    |



|                         |                 |                 |                 |                 |
|-------------------------|-----------------|-----------------|-----------------|-----------------|
| GOF ( $F^2$ )           | 1.041           | 1.049           | 1.045           | 1.053           |
| $R_1^a$ ( $wR_2^b$ ), % | 0.0464 (0.1220) | 0.0787 (0.2324) | 0.0430 (0.1152) | 0.0524 (0.1452) |

**3. X-ray Crystal Structures** (50% ellipsoid contour percent probability):

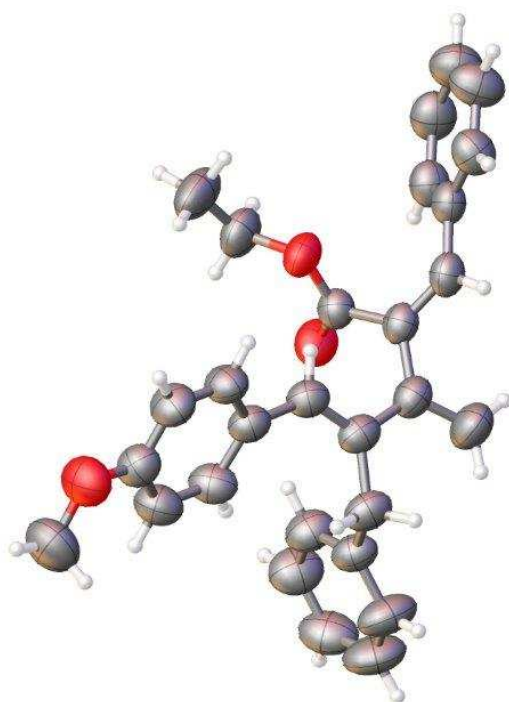

**Figure S1:** X-ray structure of **11a**, CCDC No. 1427878

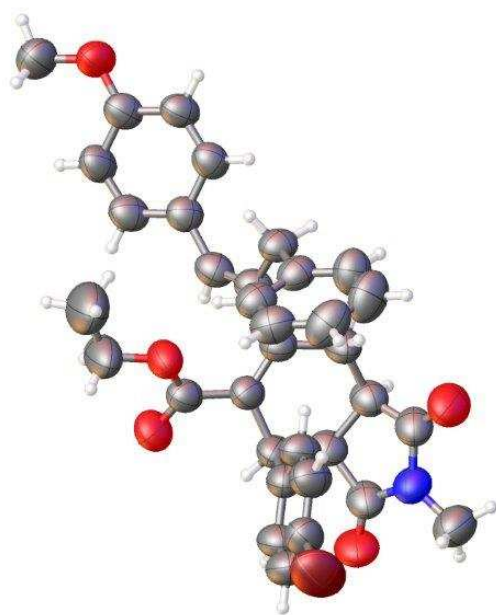

**Figure S2:** X-ray structure of **15**, CCDC No. 1427914

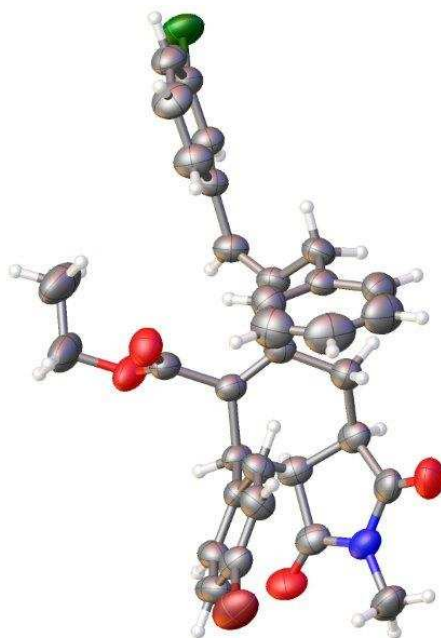

**Figure S3:** X-ray structure of **16**, CCDC No. 1427900

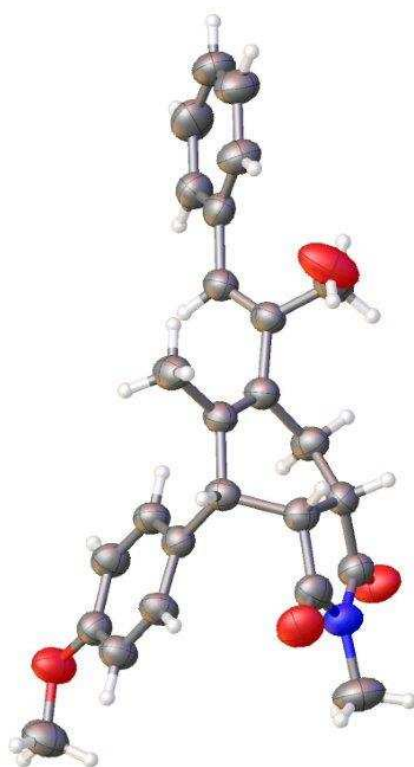

**Figure S4:** X-ray structure of **19**, CCDC No. 1427915

#### 4. References:

- 1) R.C. Clark, J. S. Reid, *Acta Cryst.* **1995**, A51, 887.
- 2) G.M. Sheldrick, *Acta Cryst.* **2008**, A64, 112.
- 3) O.V. Dolomanov, L.J. Bourhis, R.J. Gildea, J.A.K. Howard, H. Puschmann, *J. Appl. Cryst.* **2009**, 42, 339.

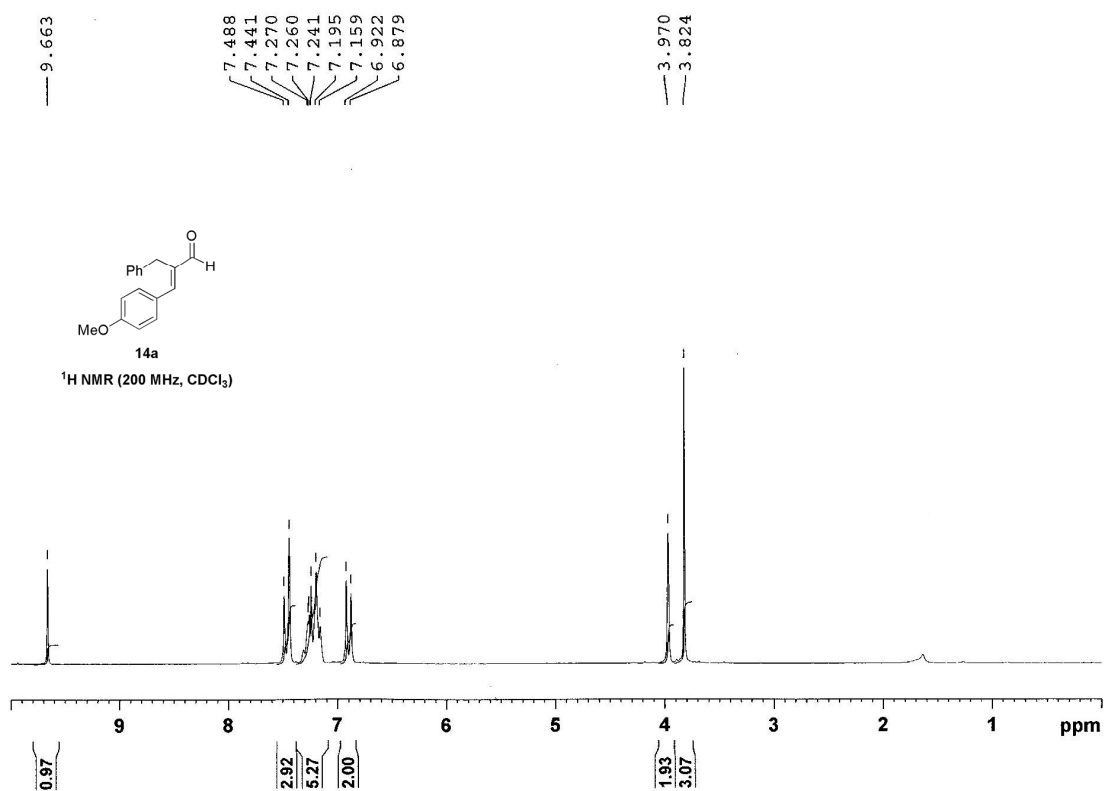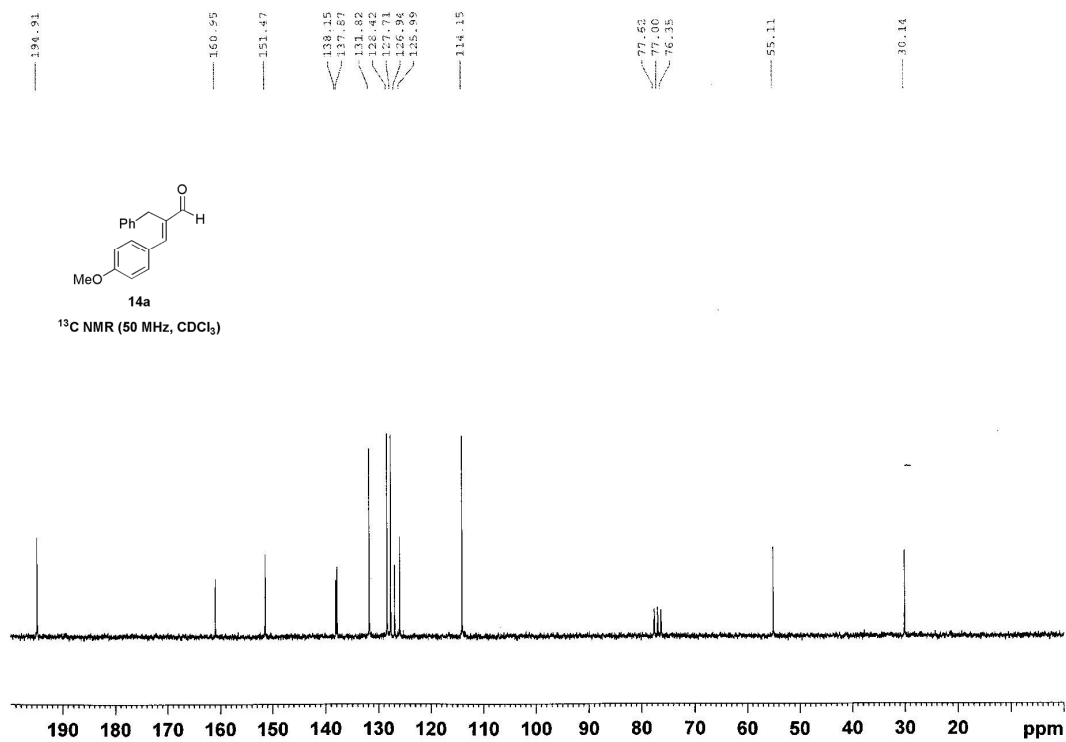

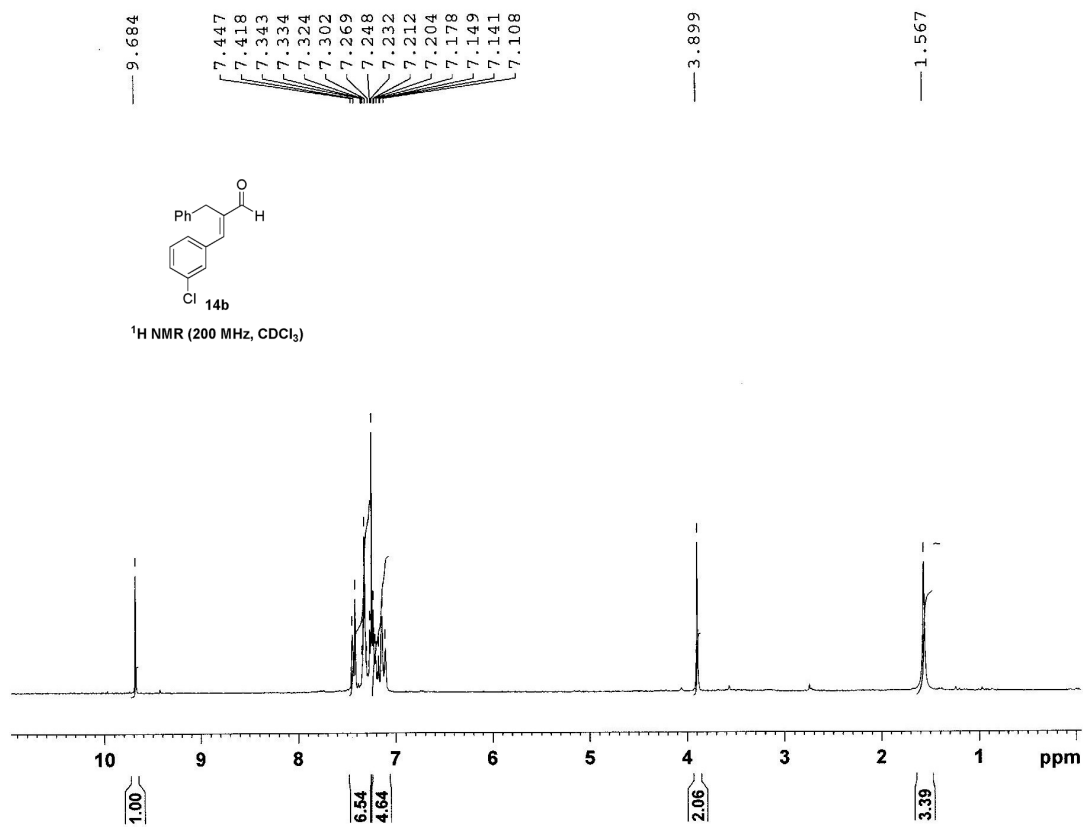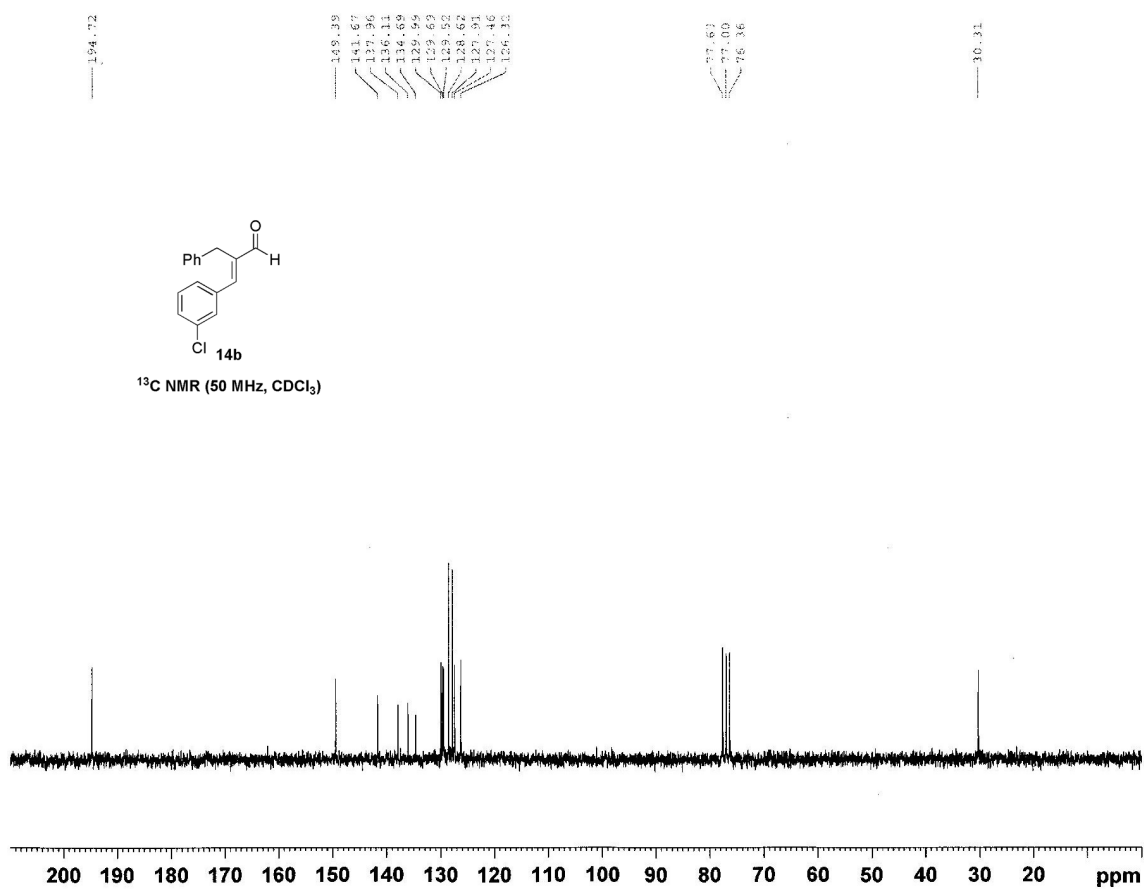

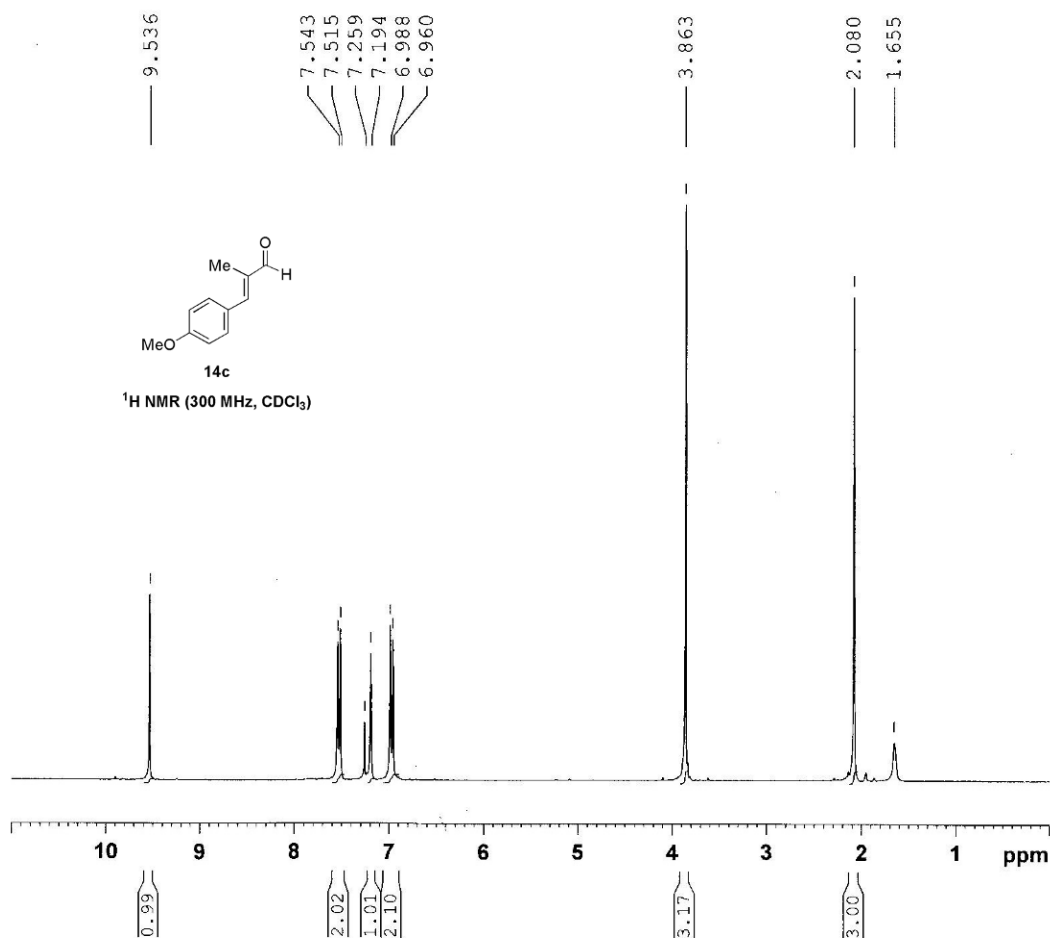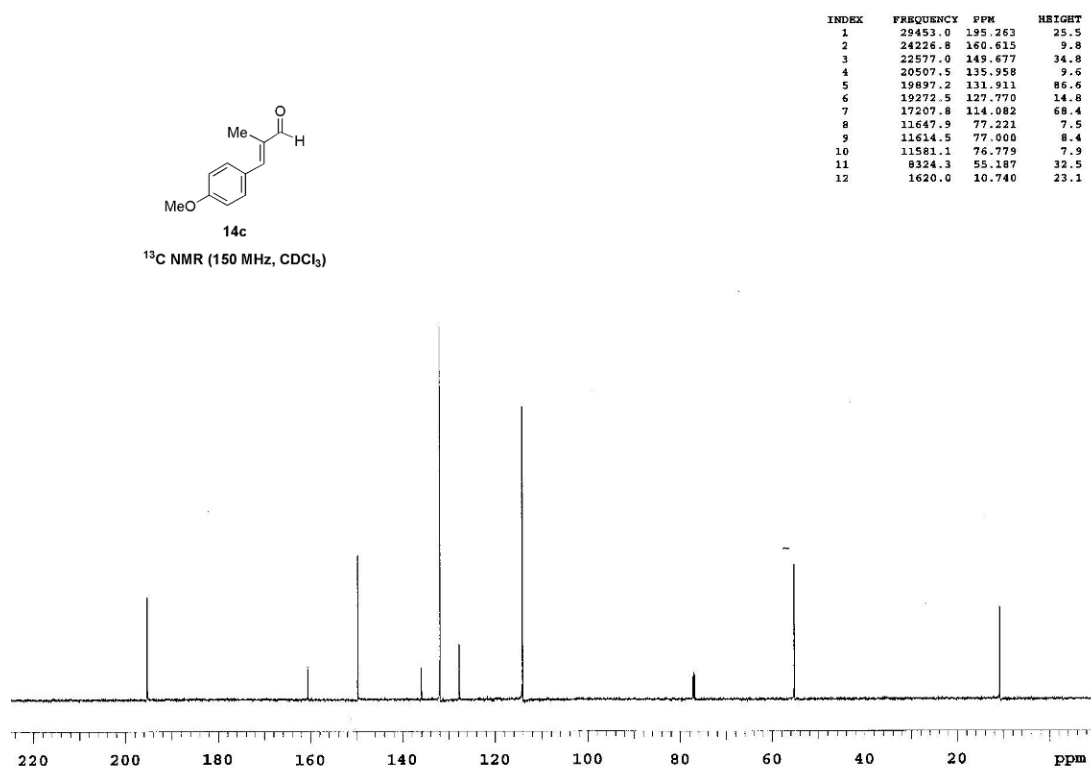

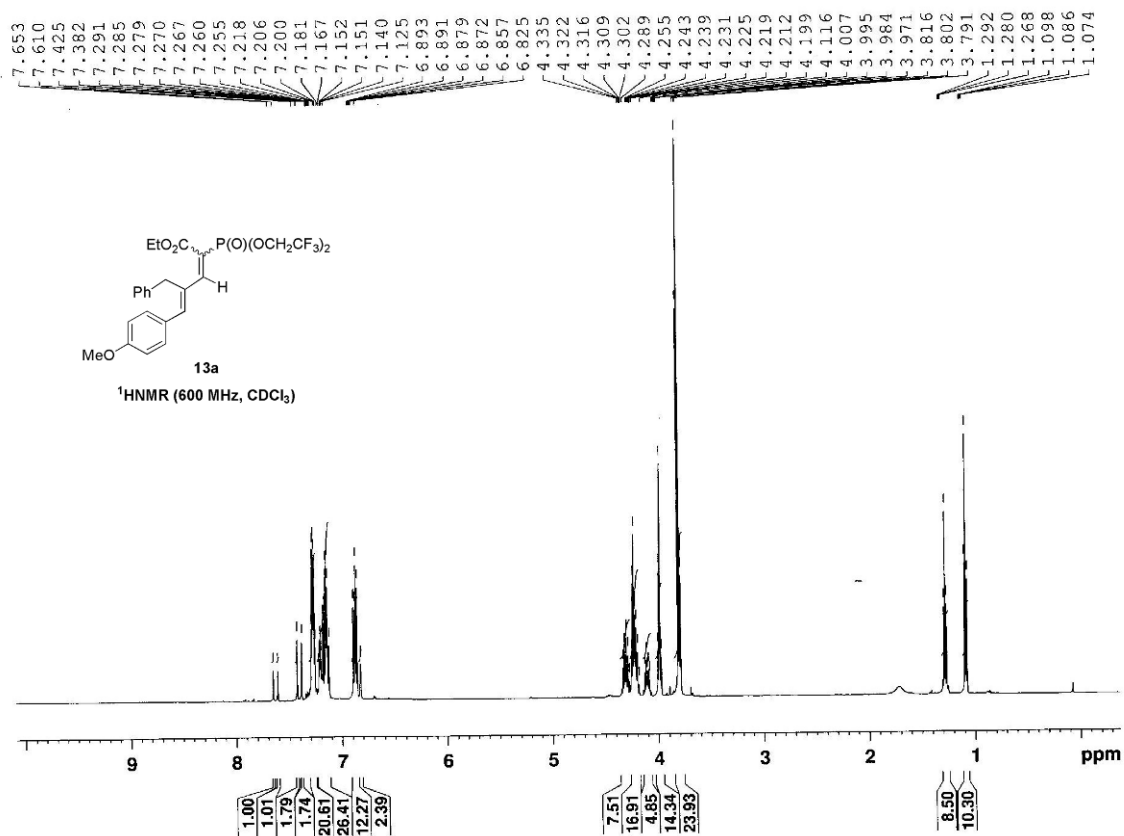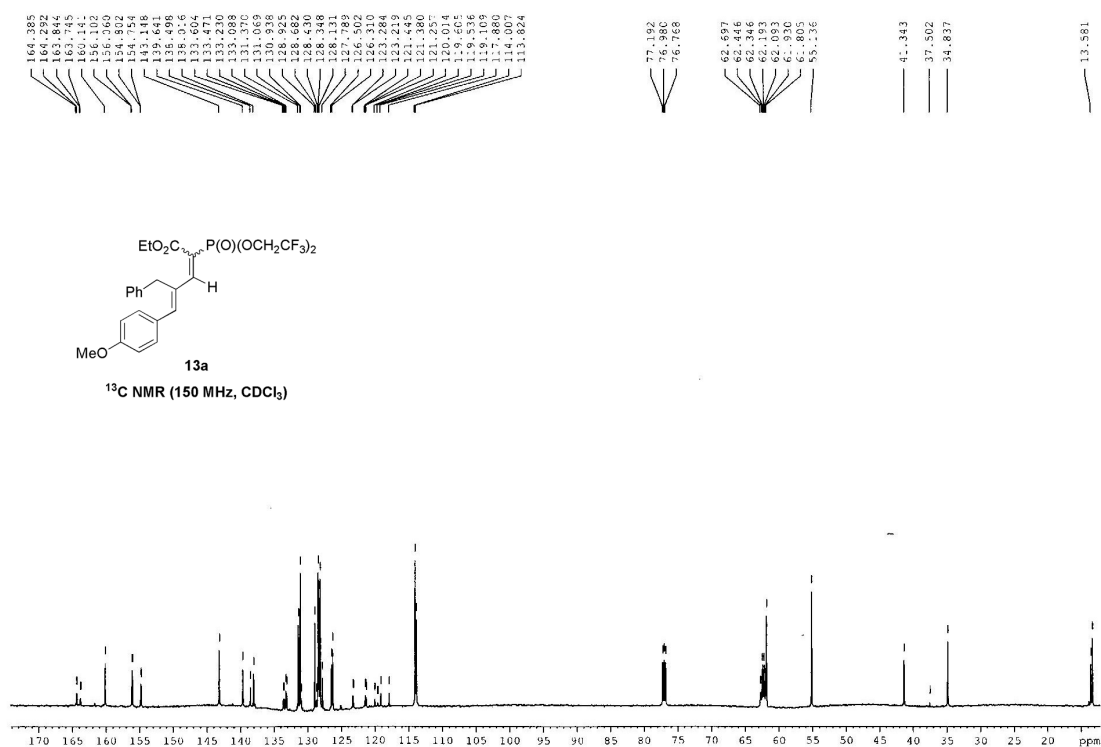

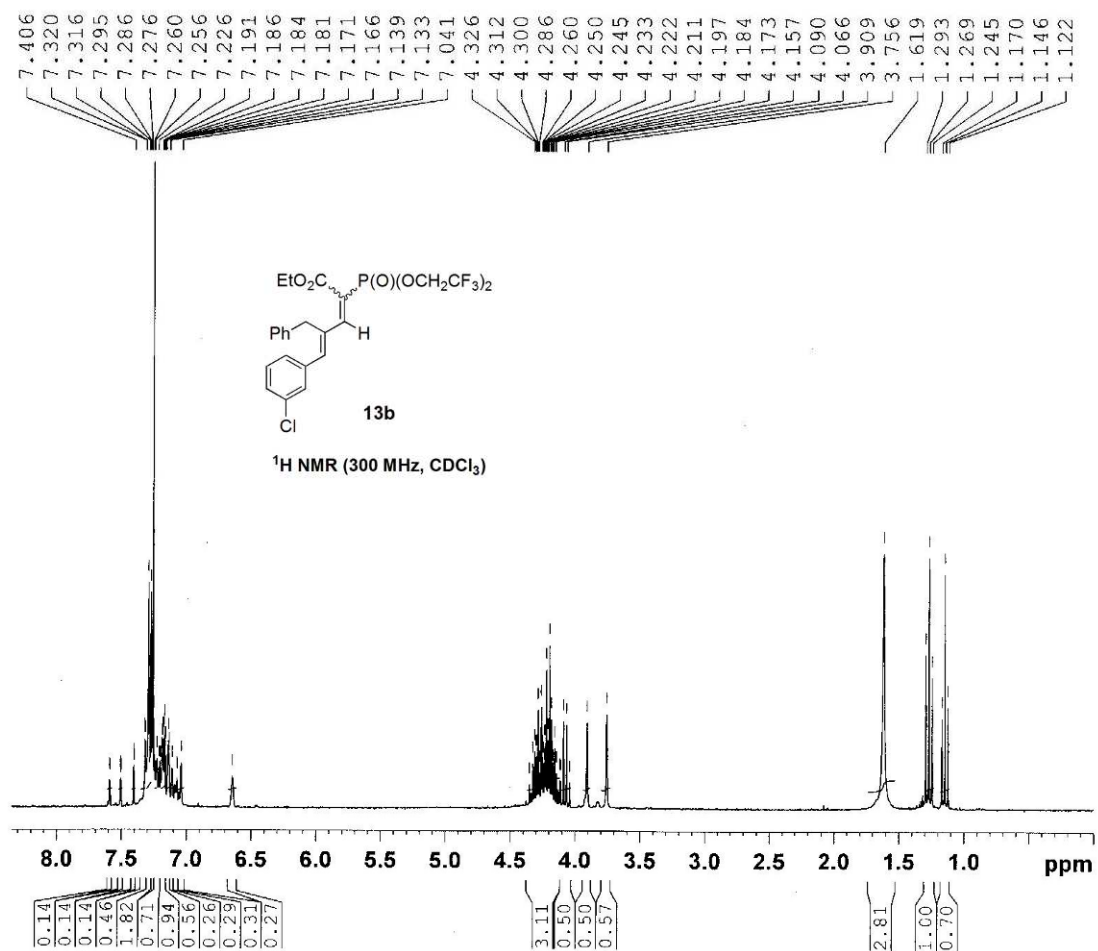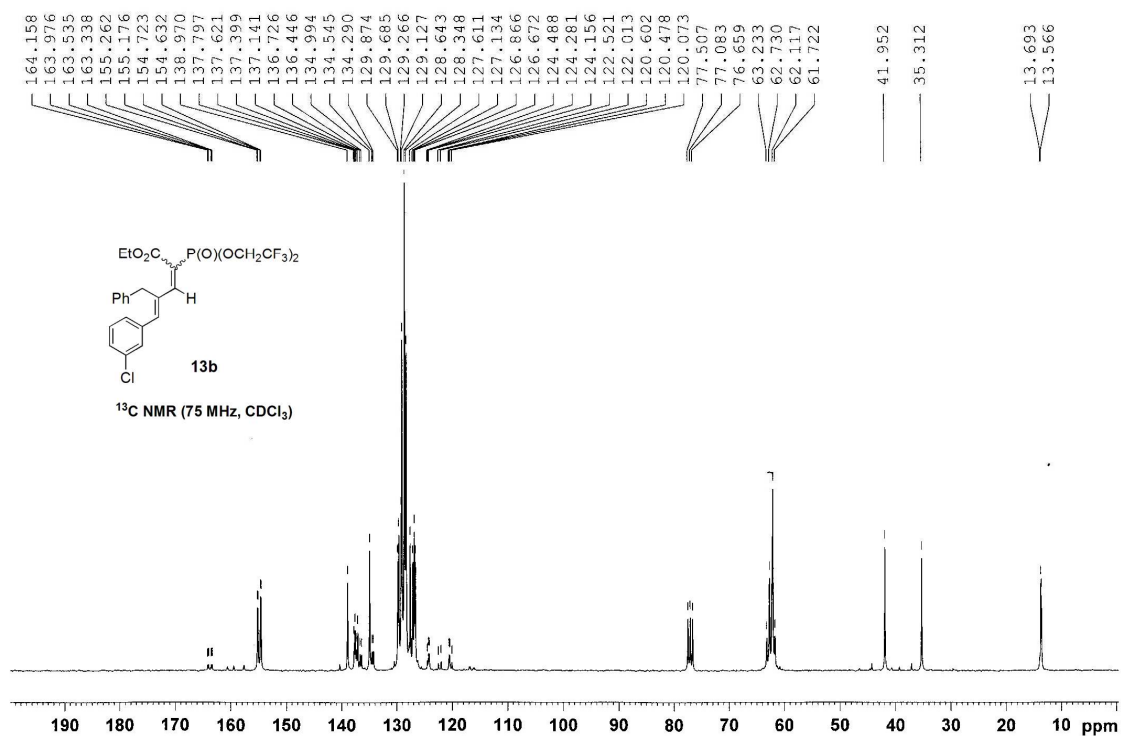



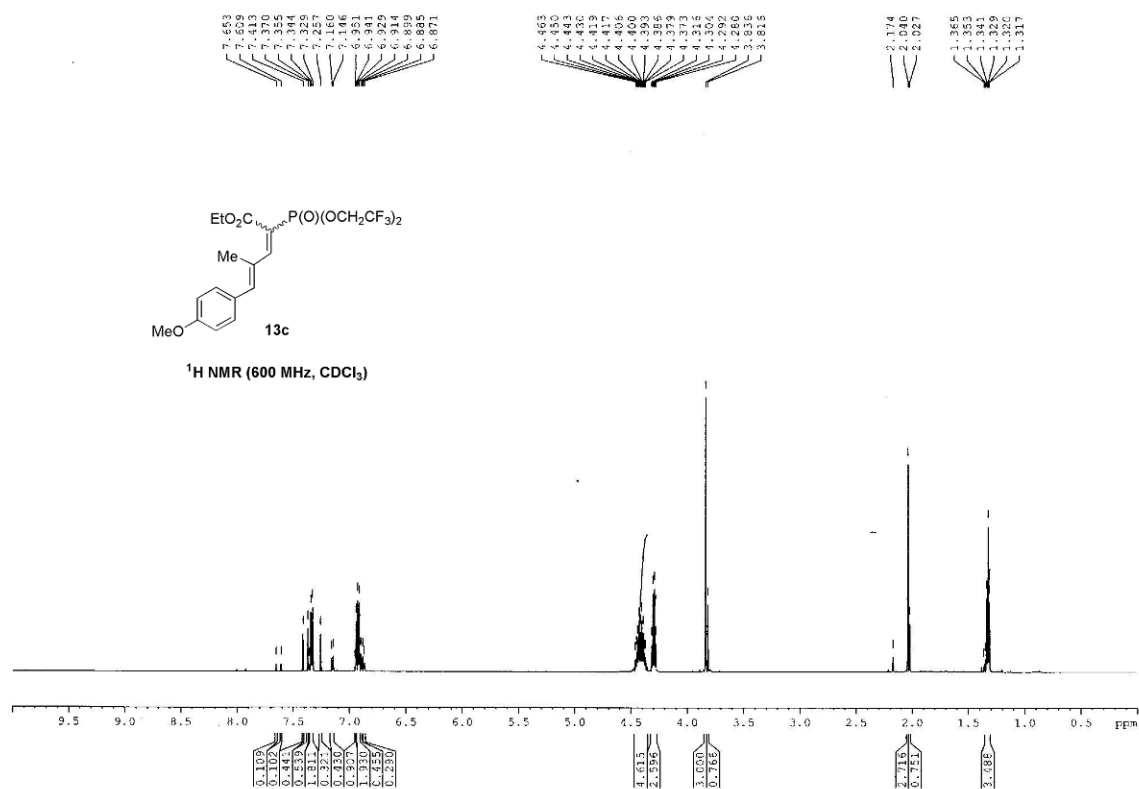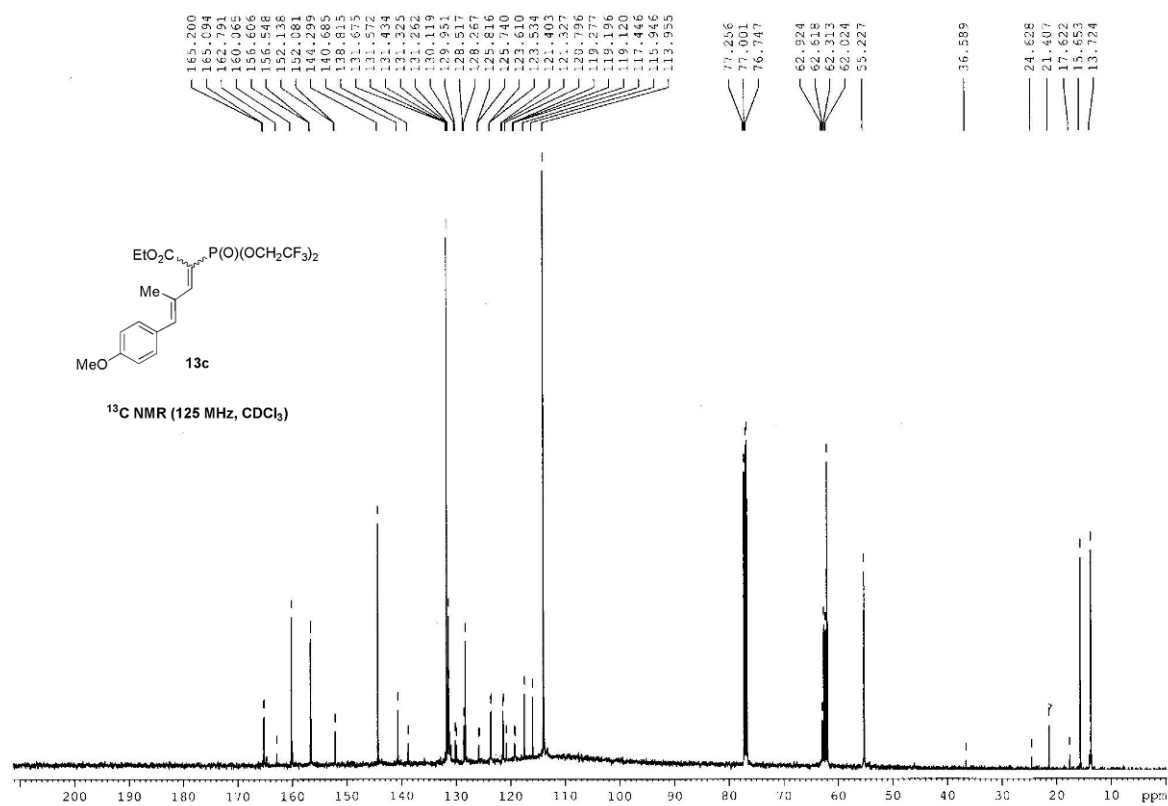

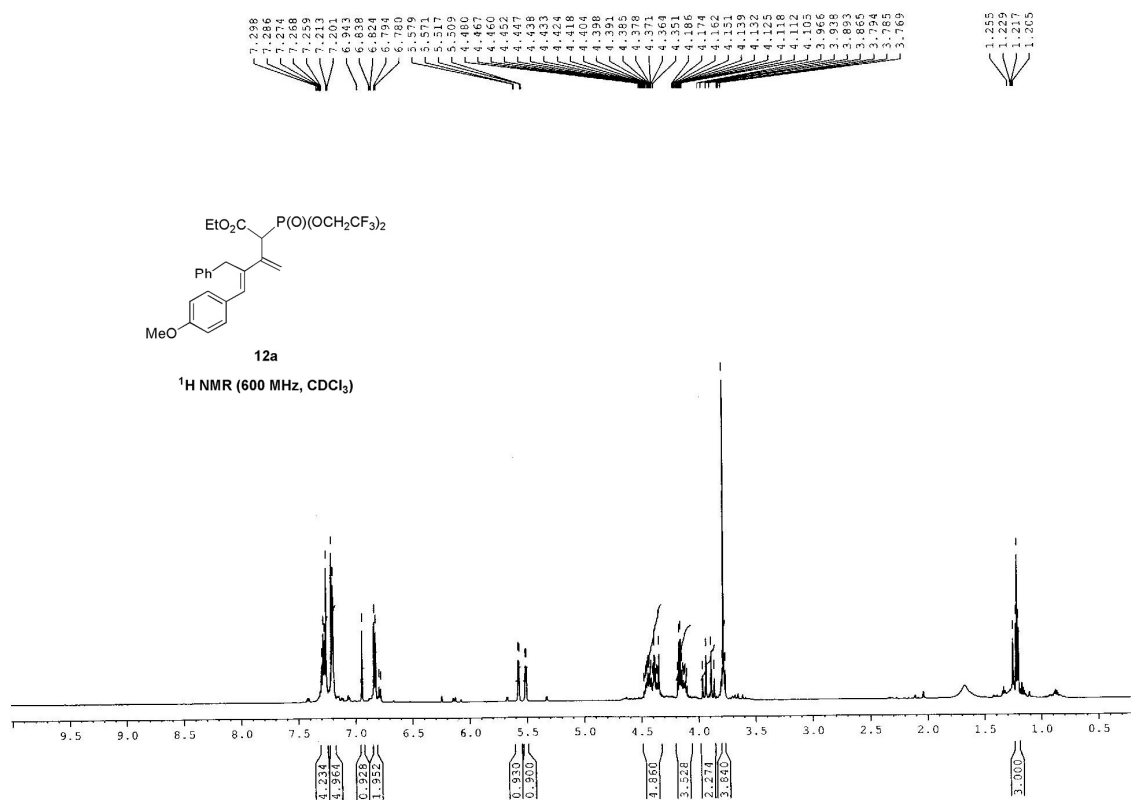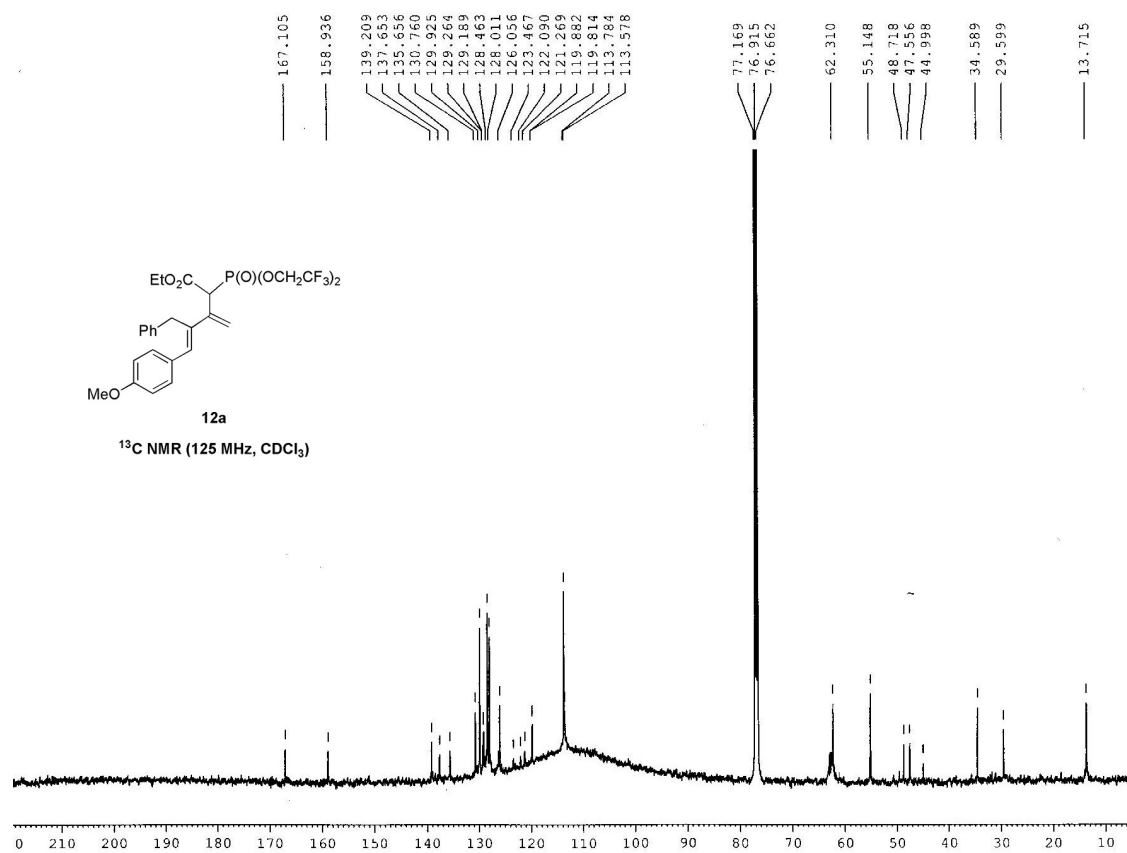

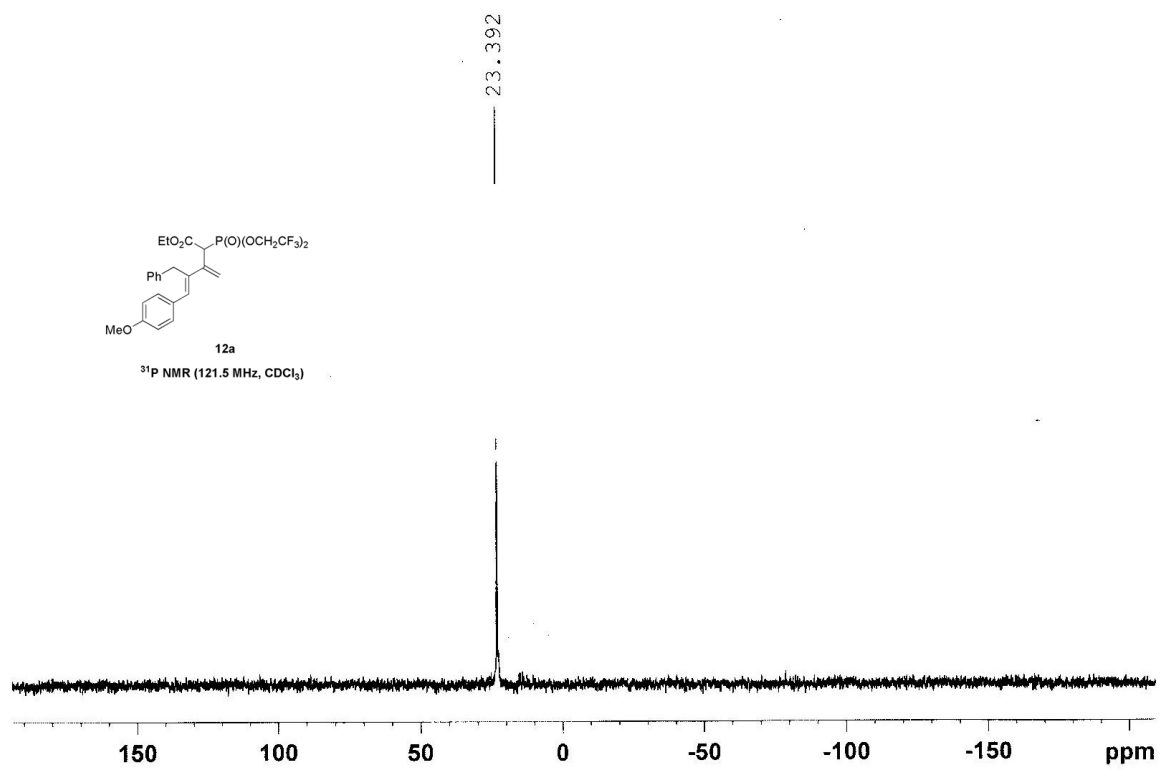

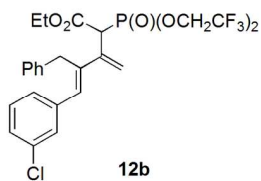

<sup>1</sup>H NMR (200 MHz, CDCl<sub>3</sub>)

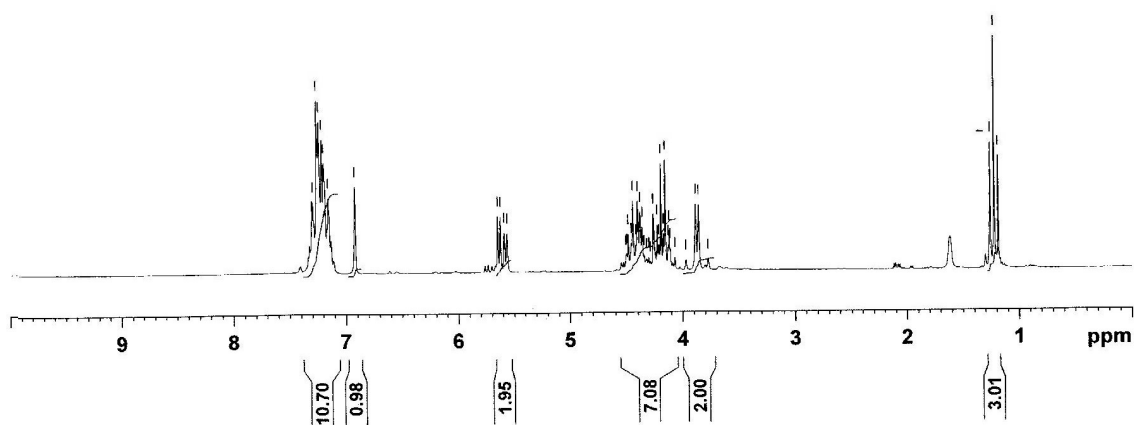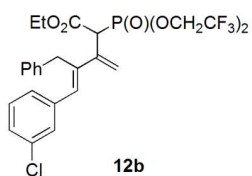

<sup>13</sup>C NMR (50 MHz, CDCl<sub>3</sub>)

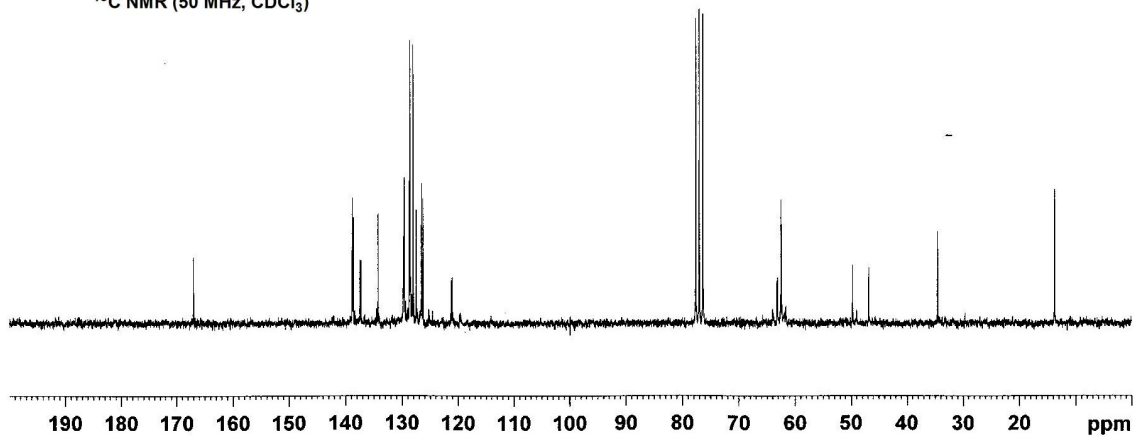

23.103

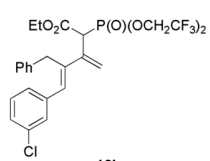

$^{31}\text{P}$  NMR (121.5 MHz,  $\text{CDCl}_3$ )

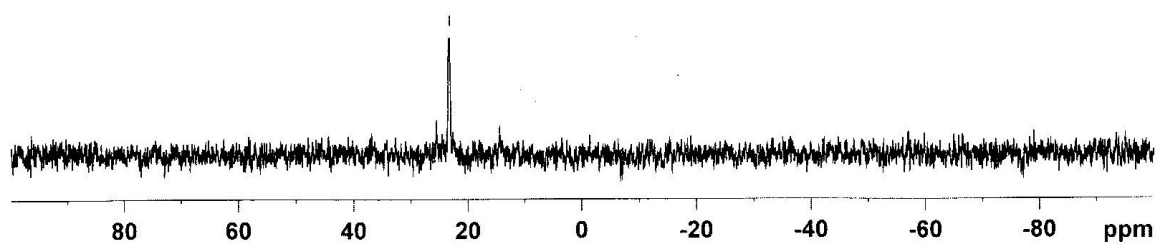

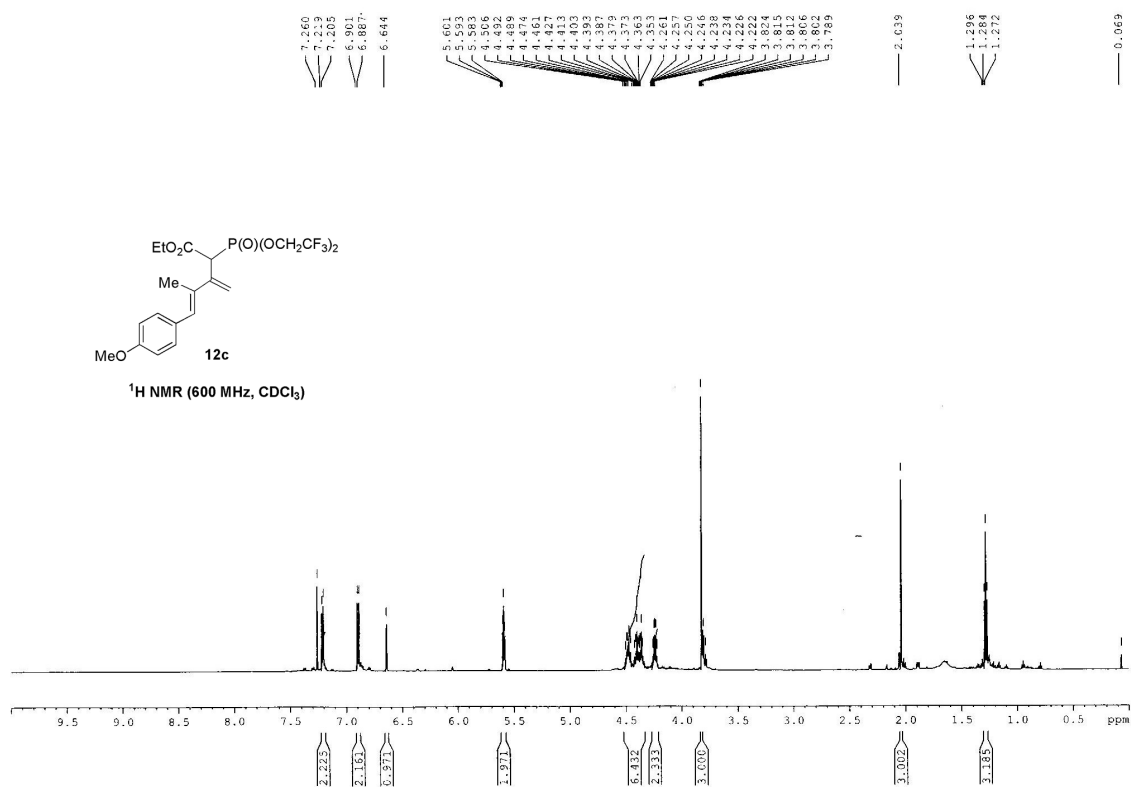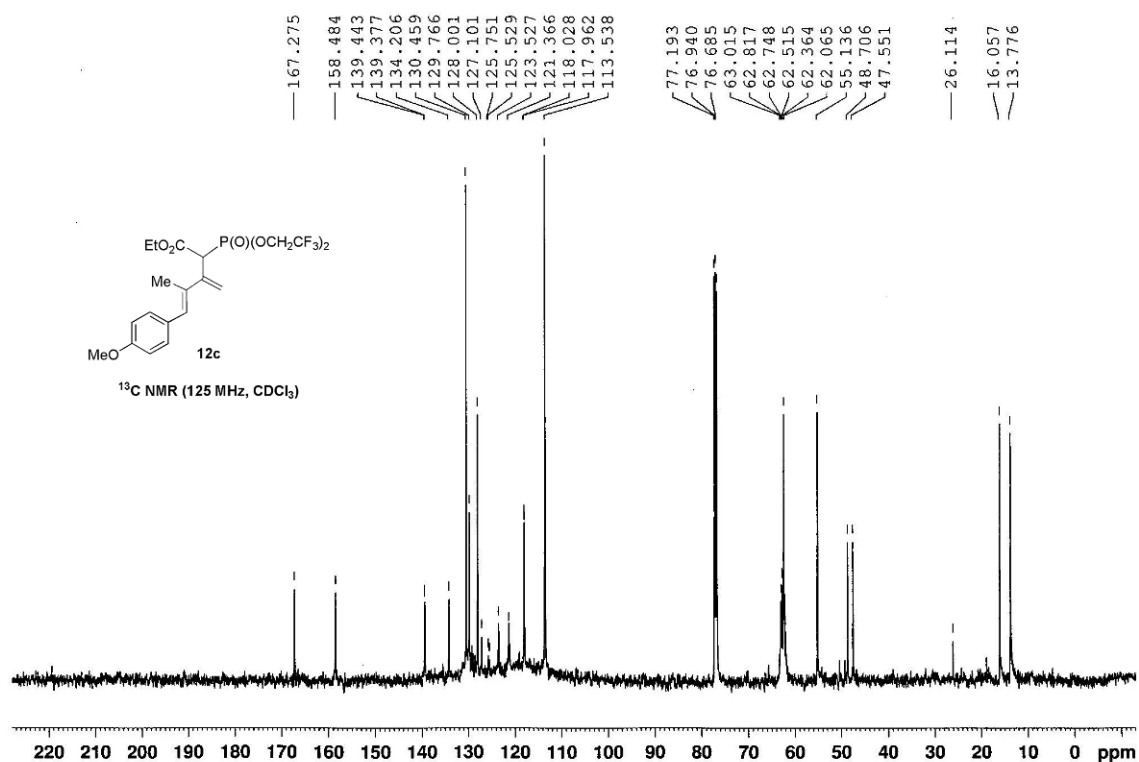

23.715

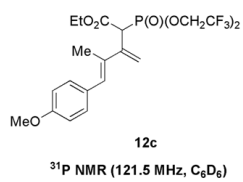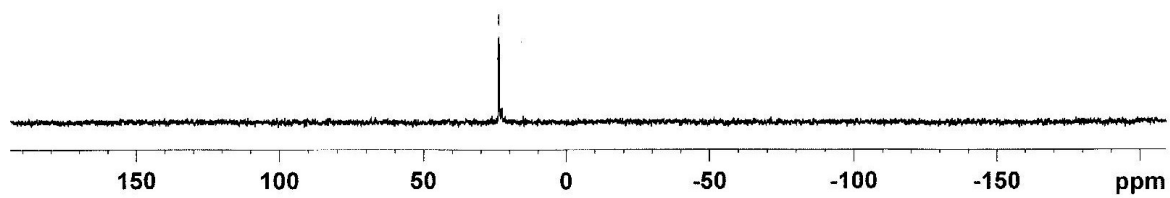

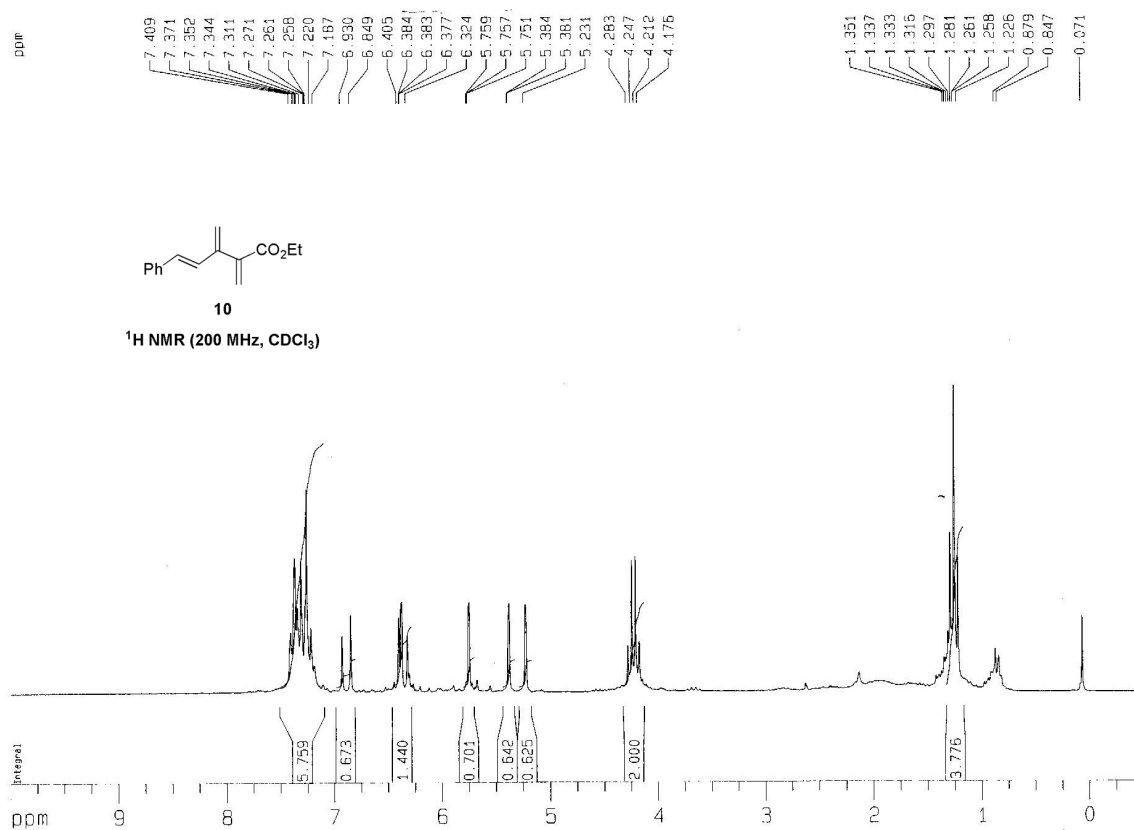



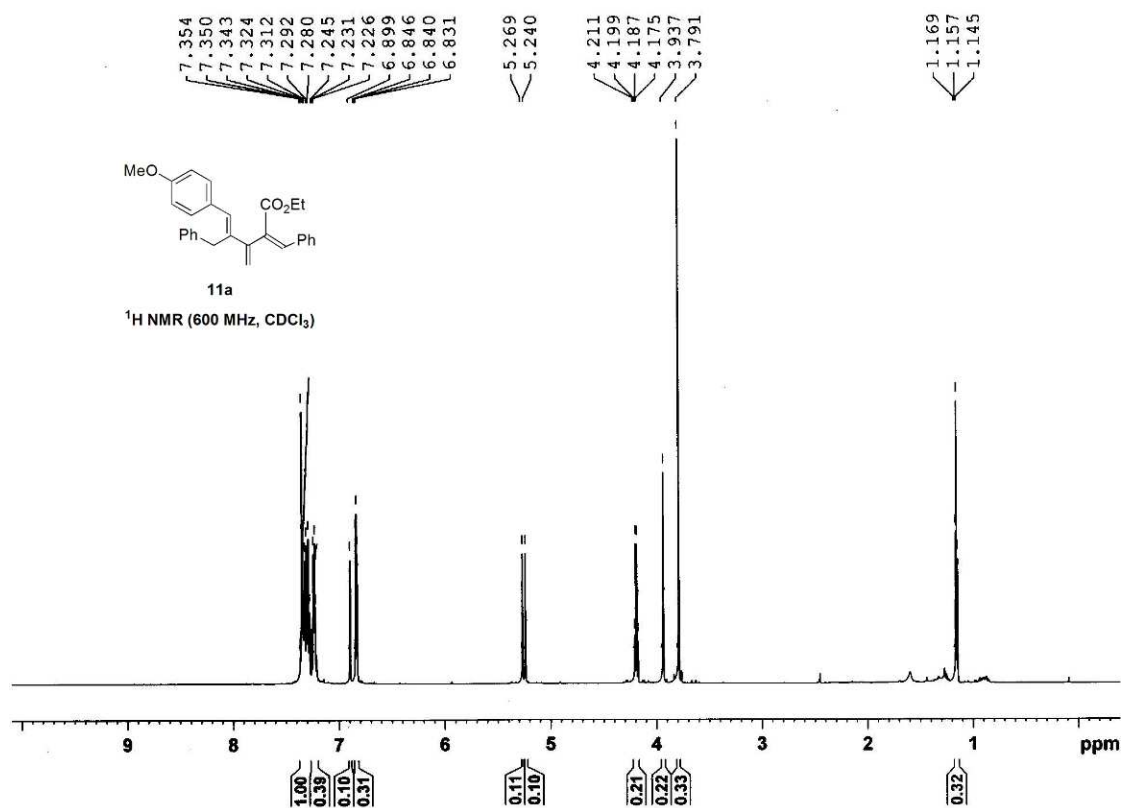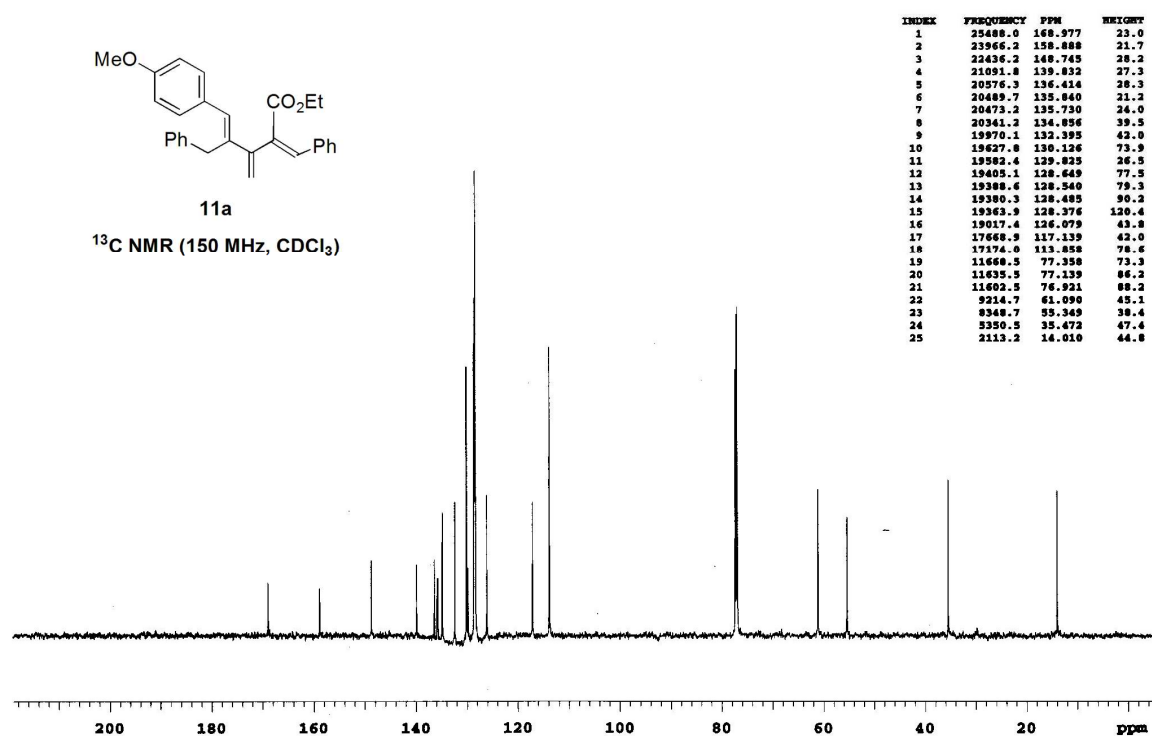

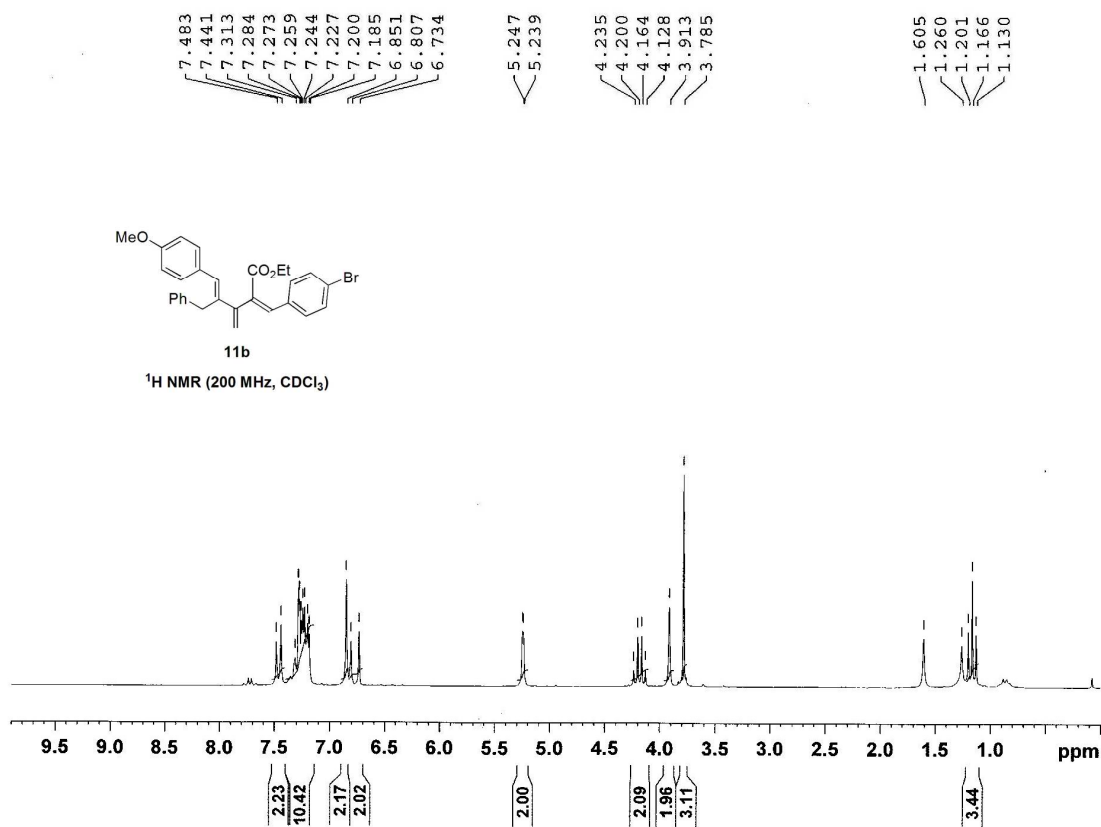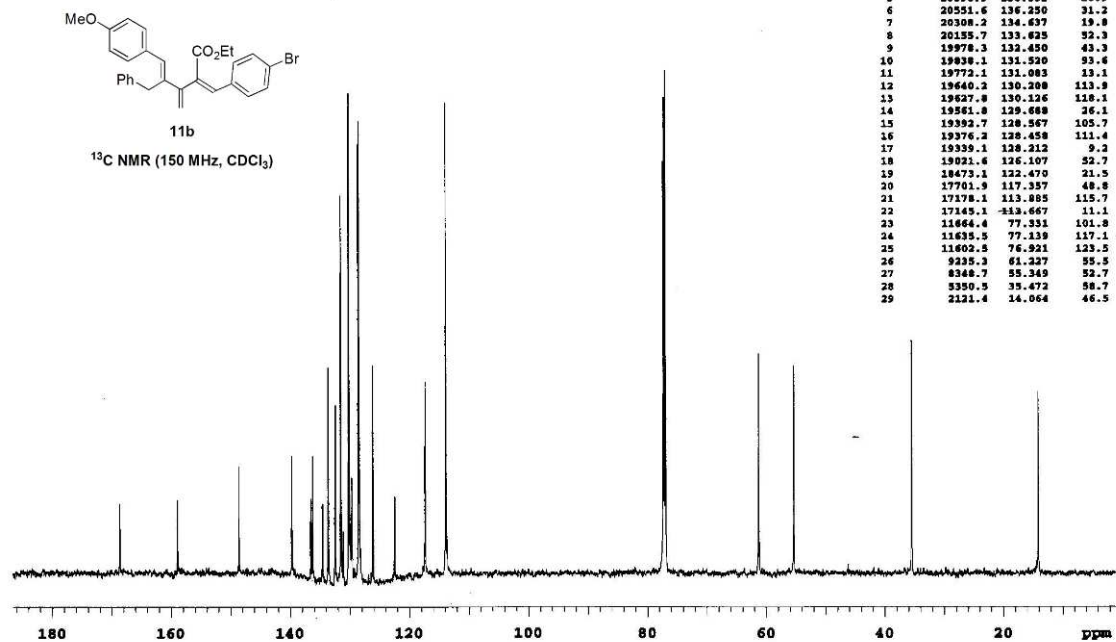

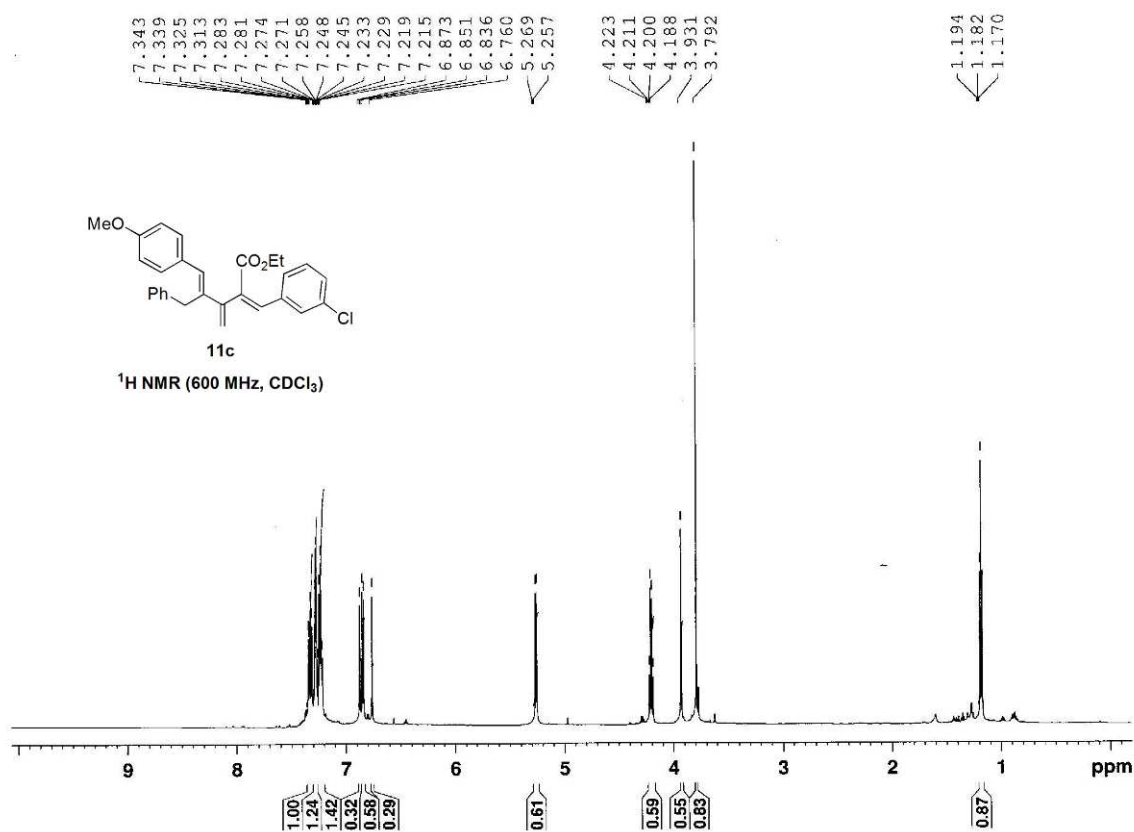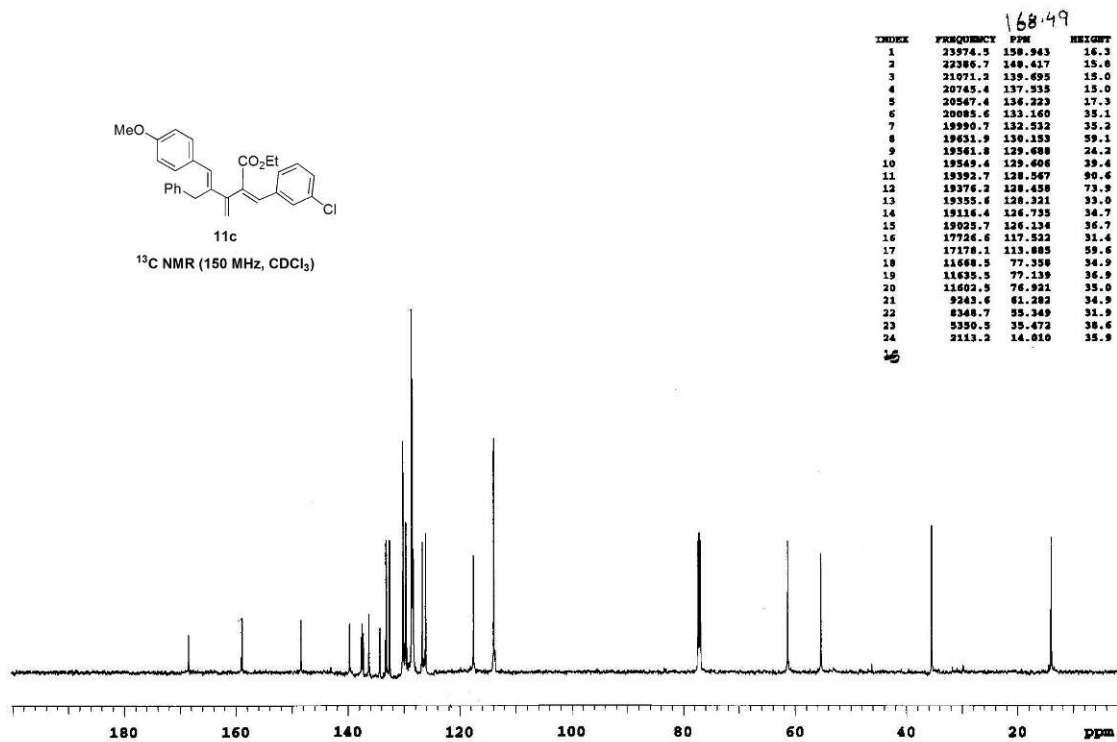

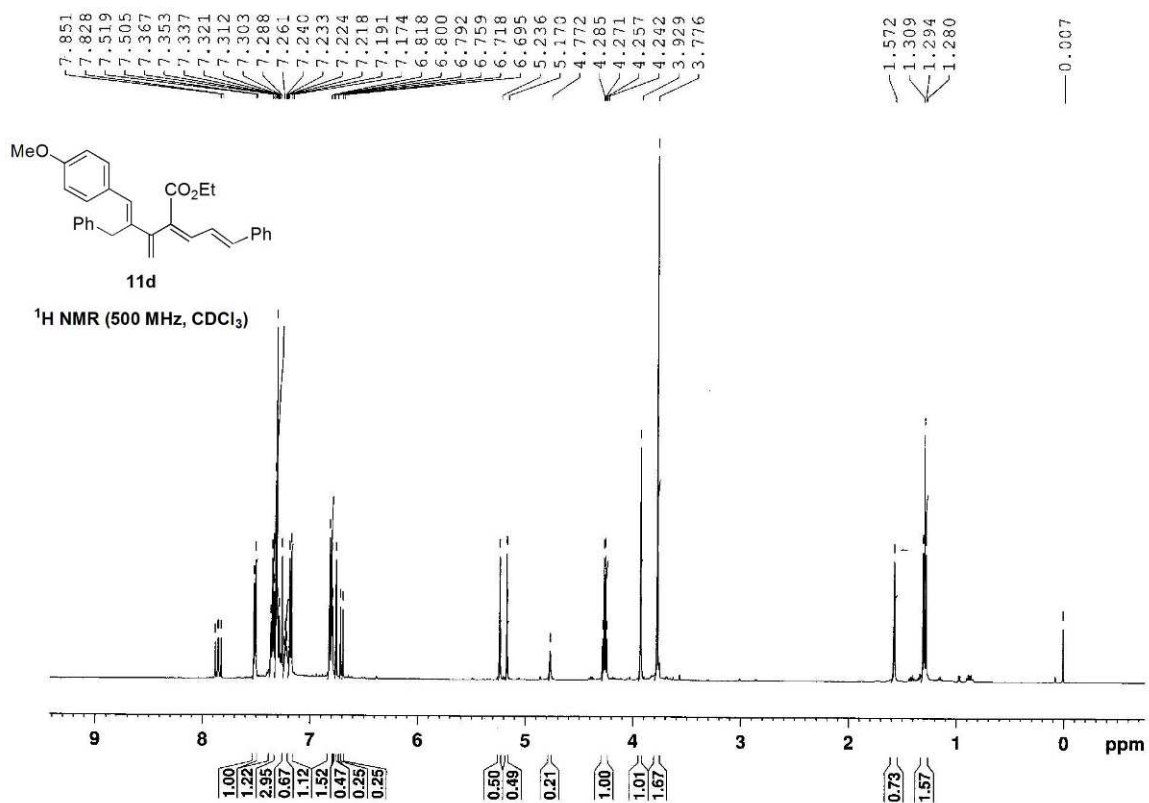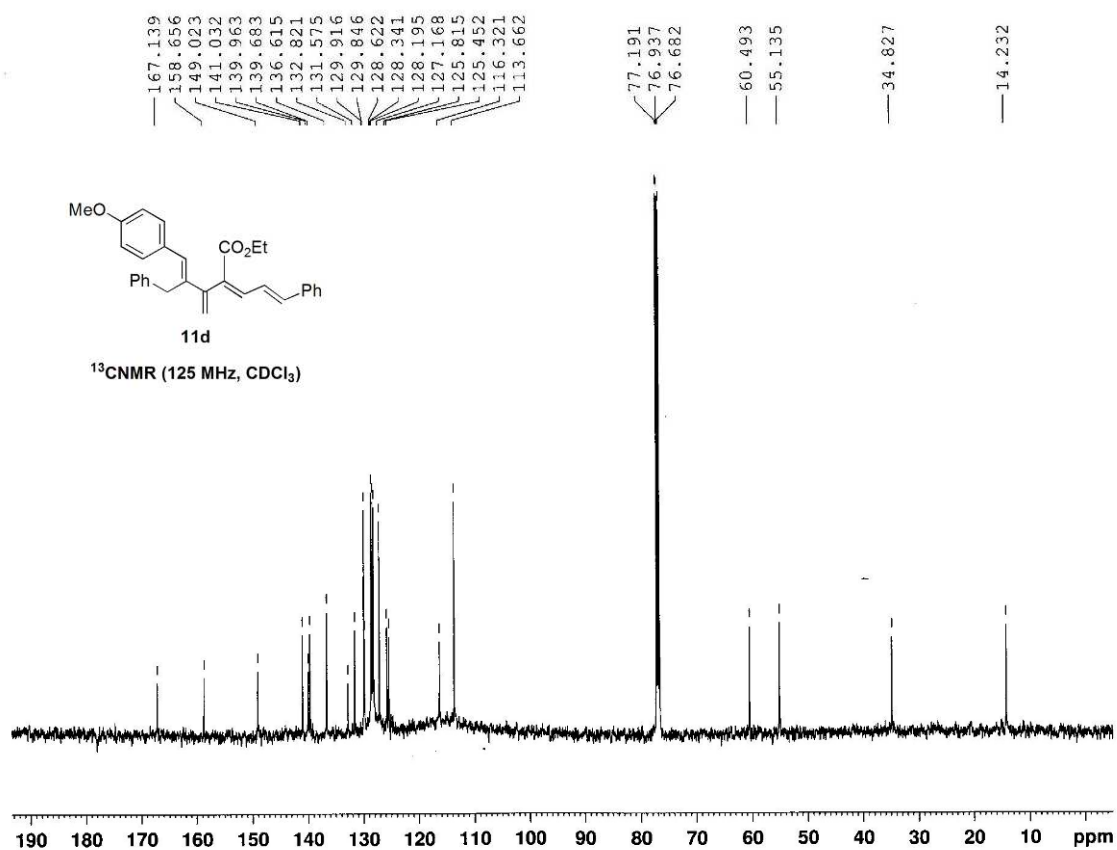

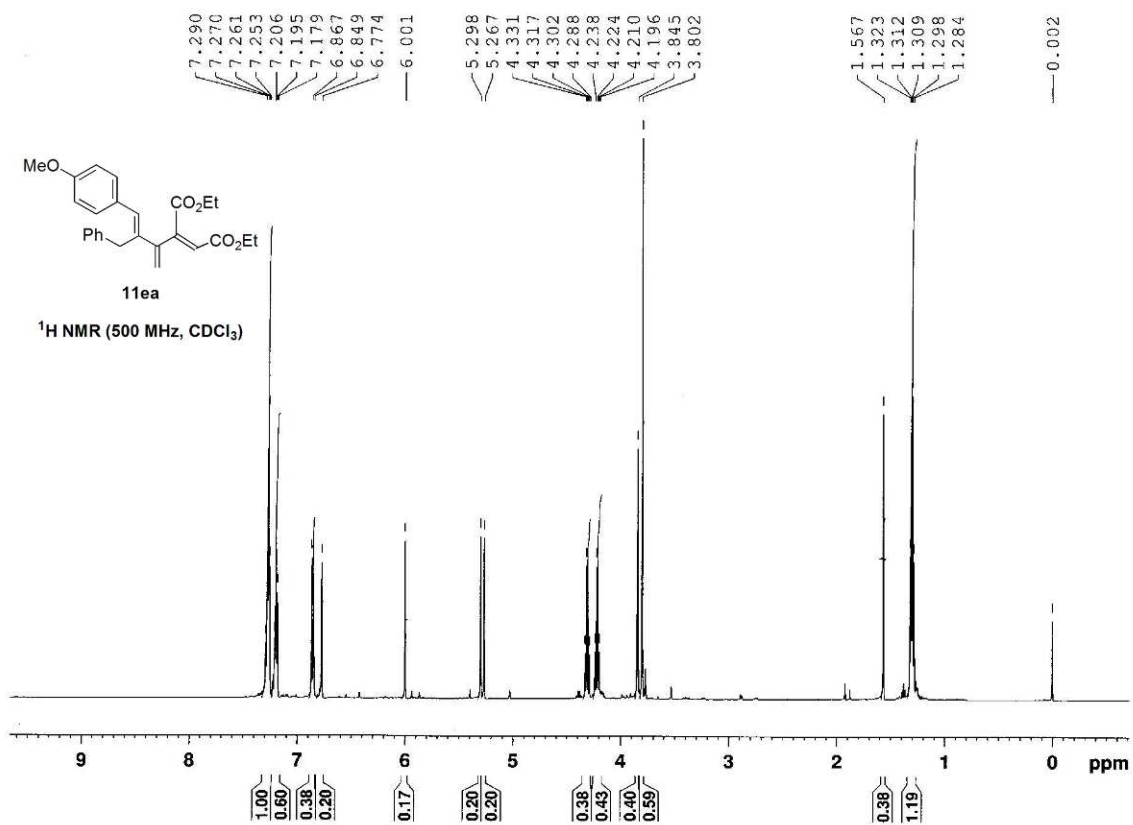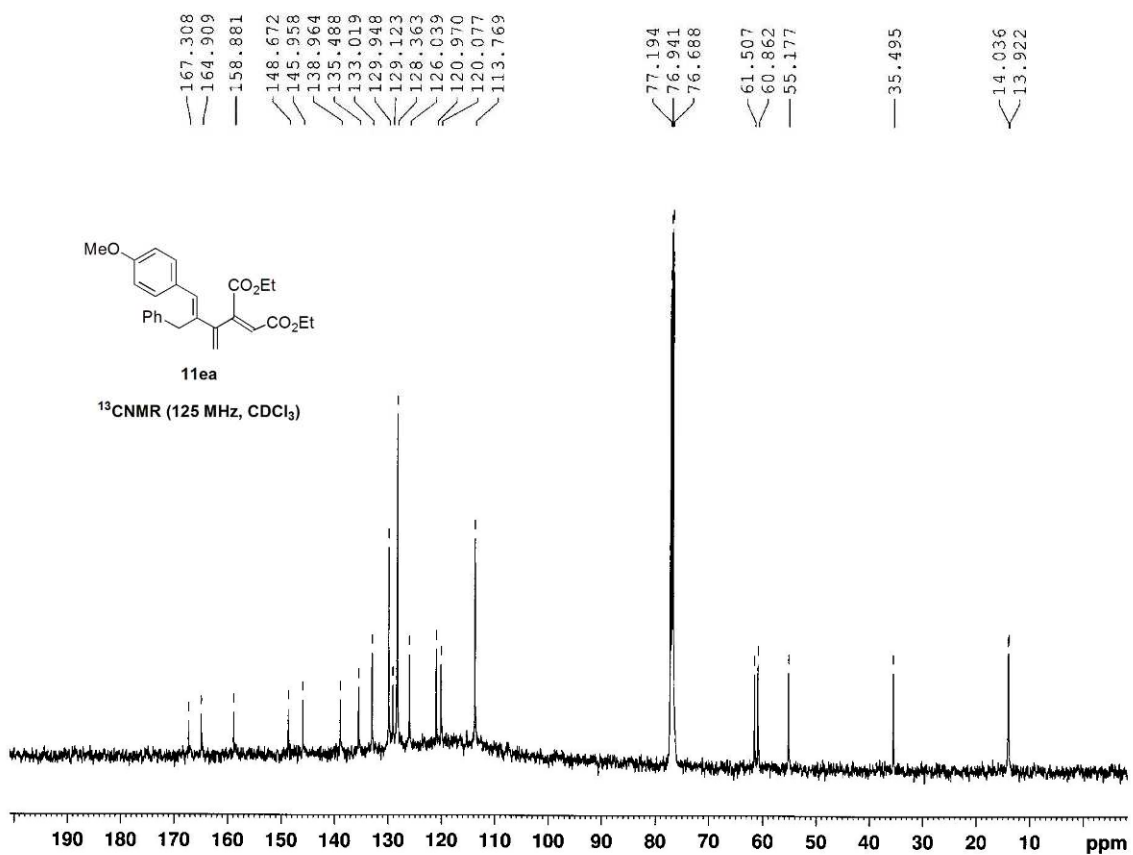

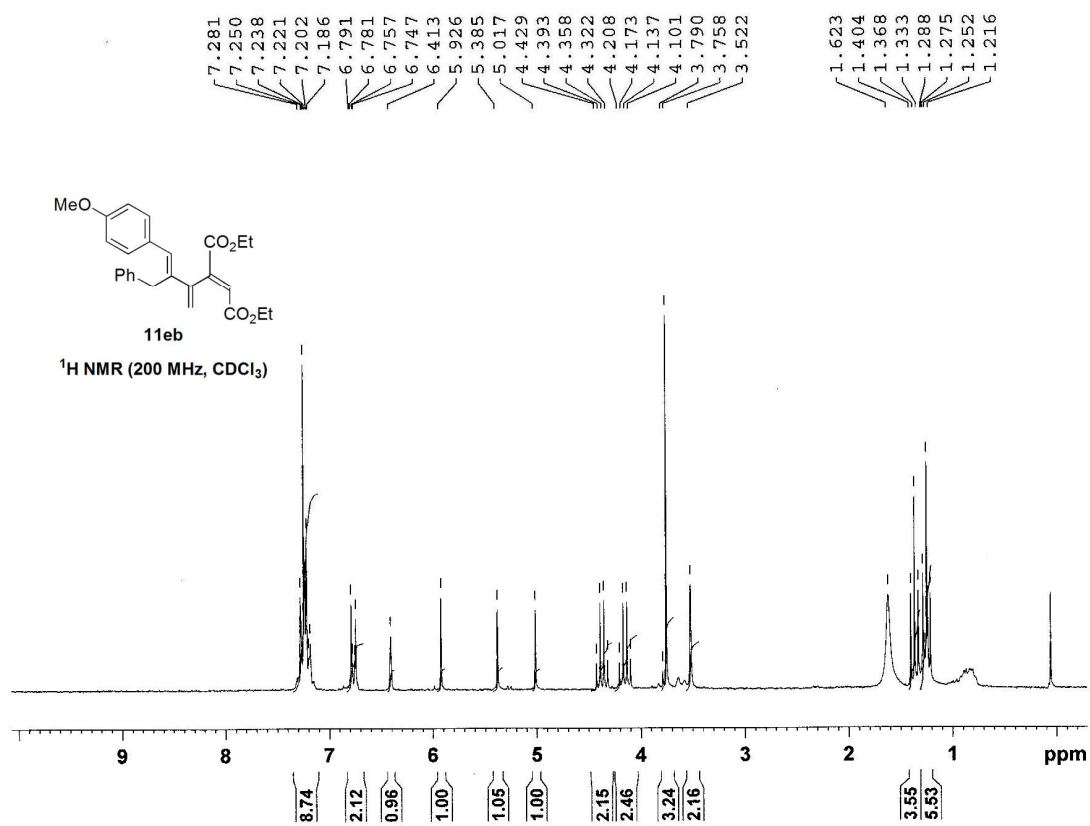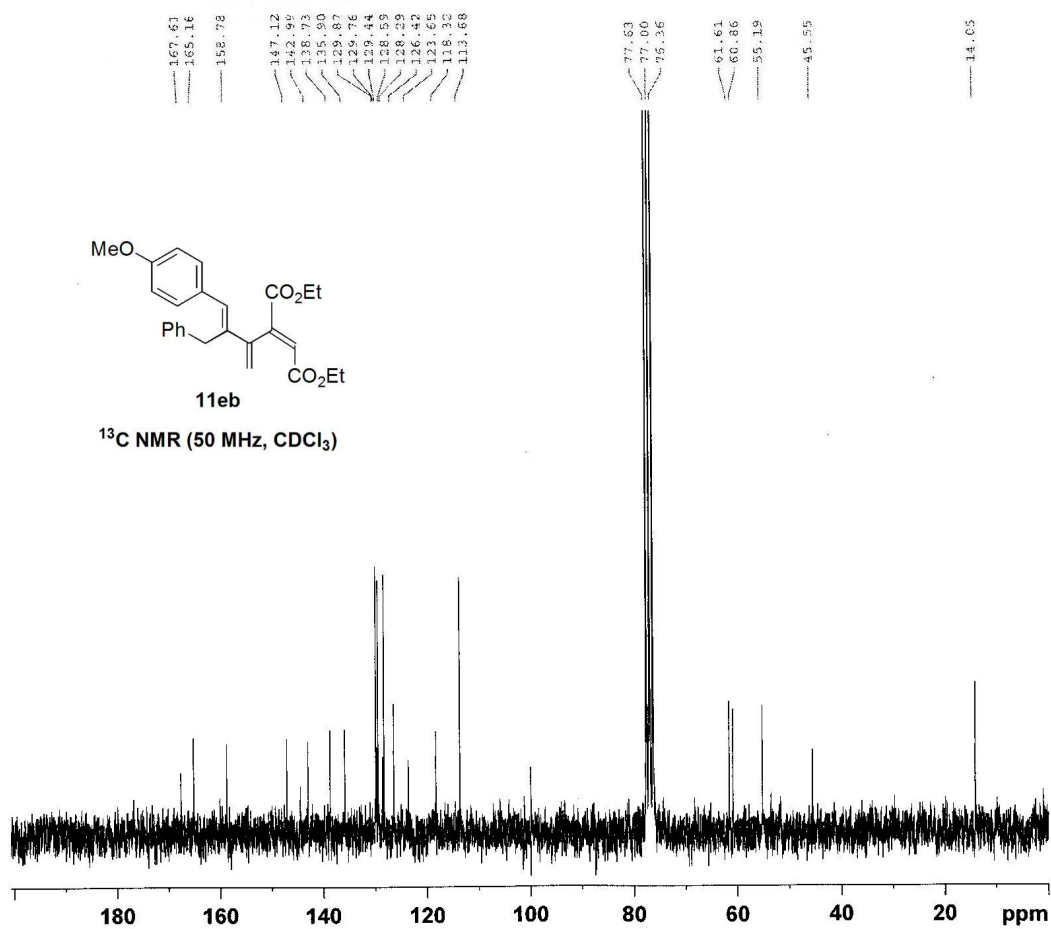

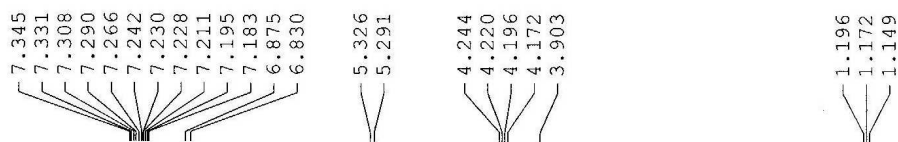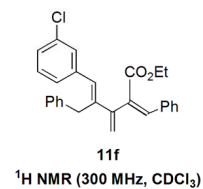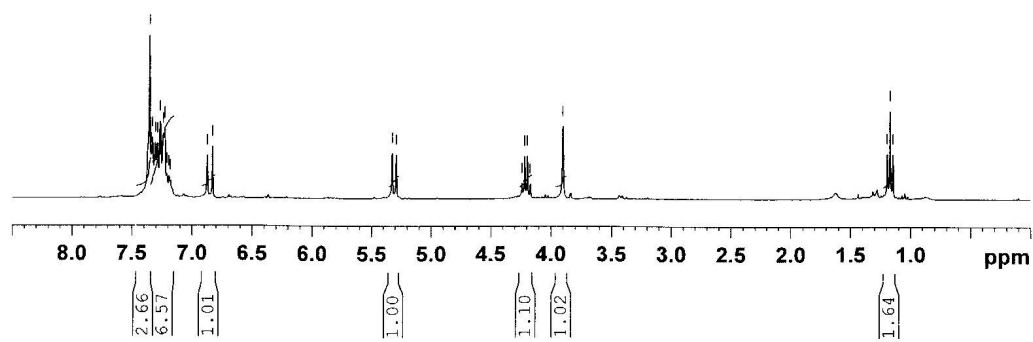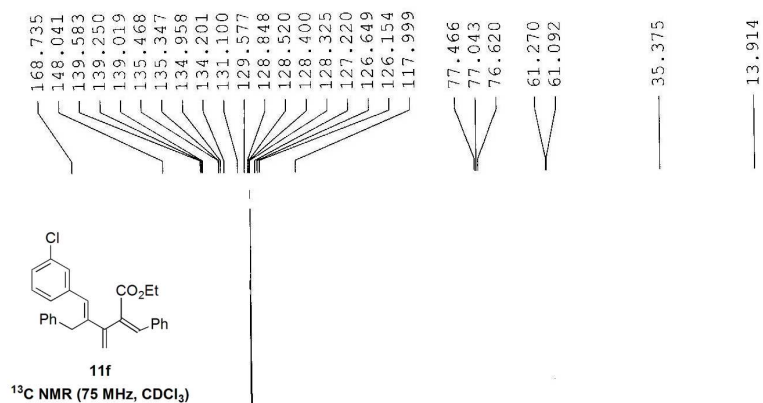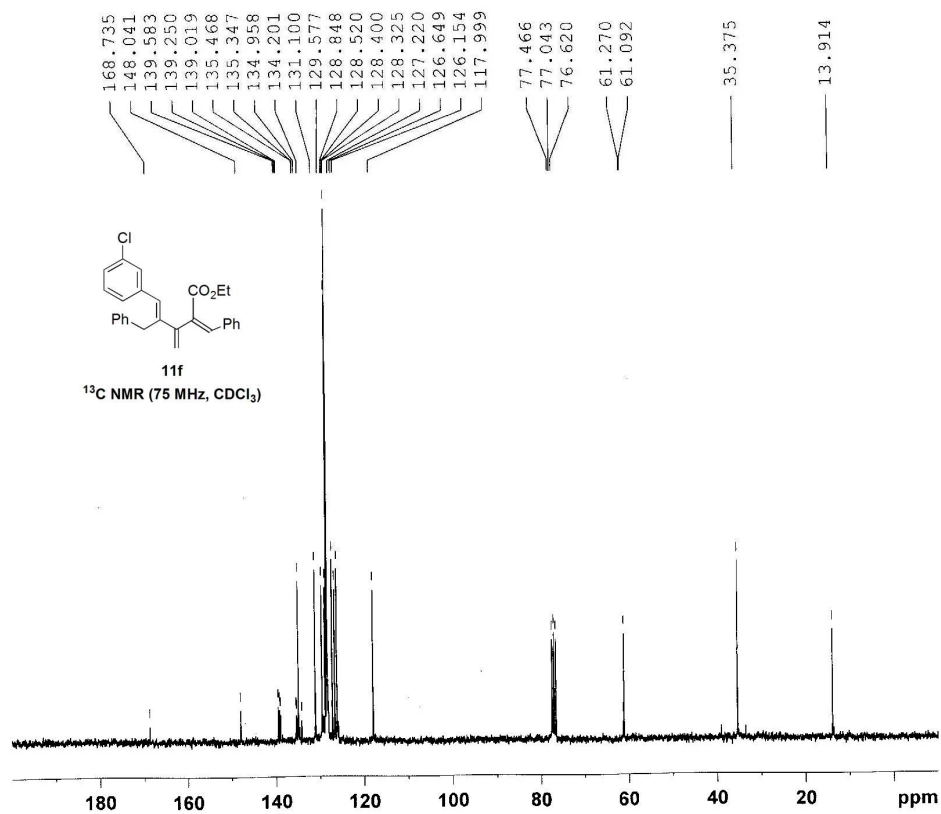

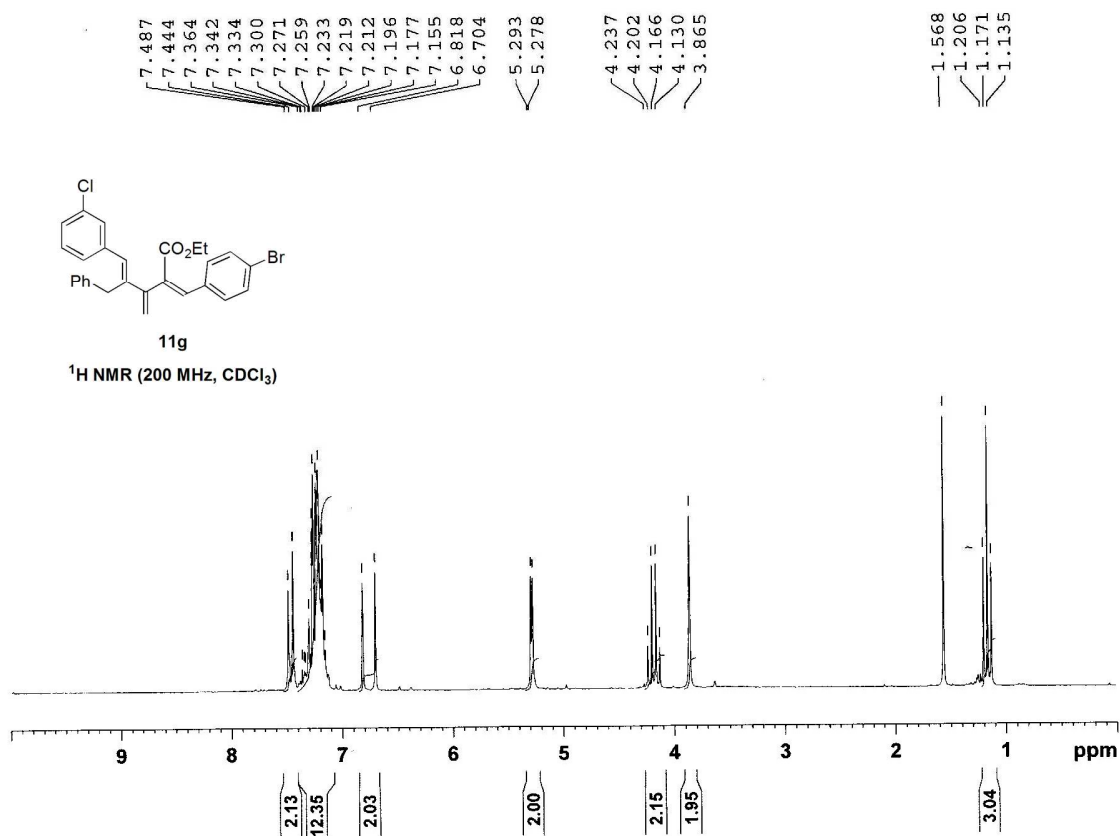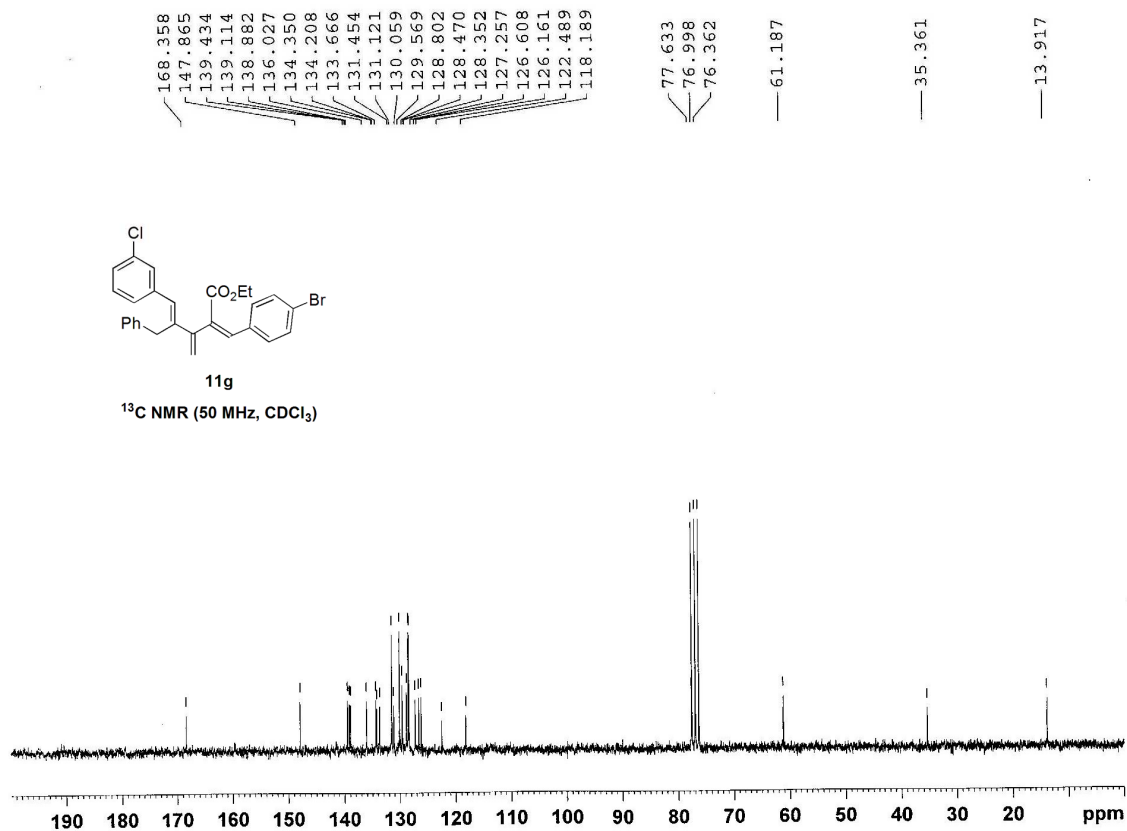



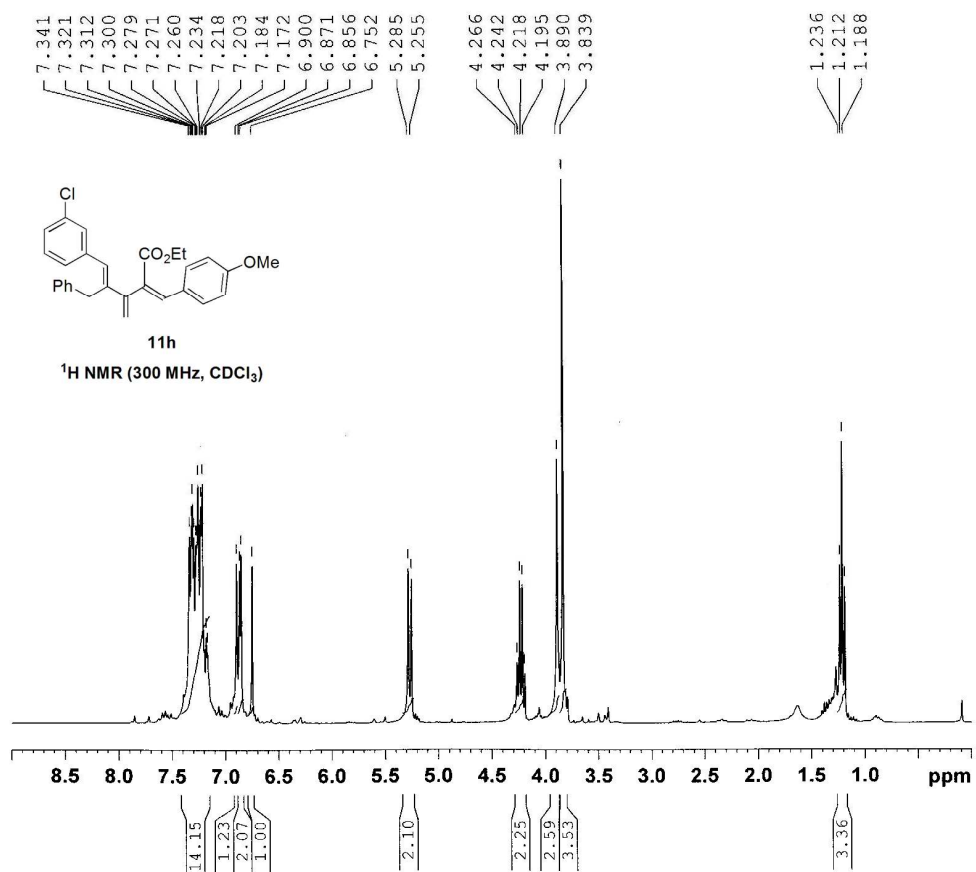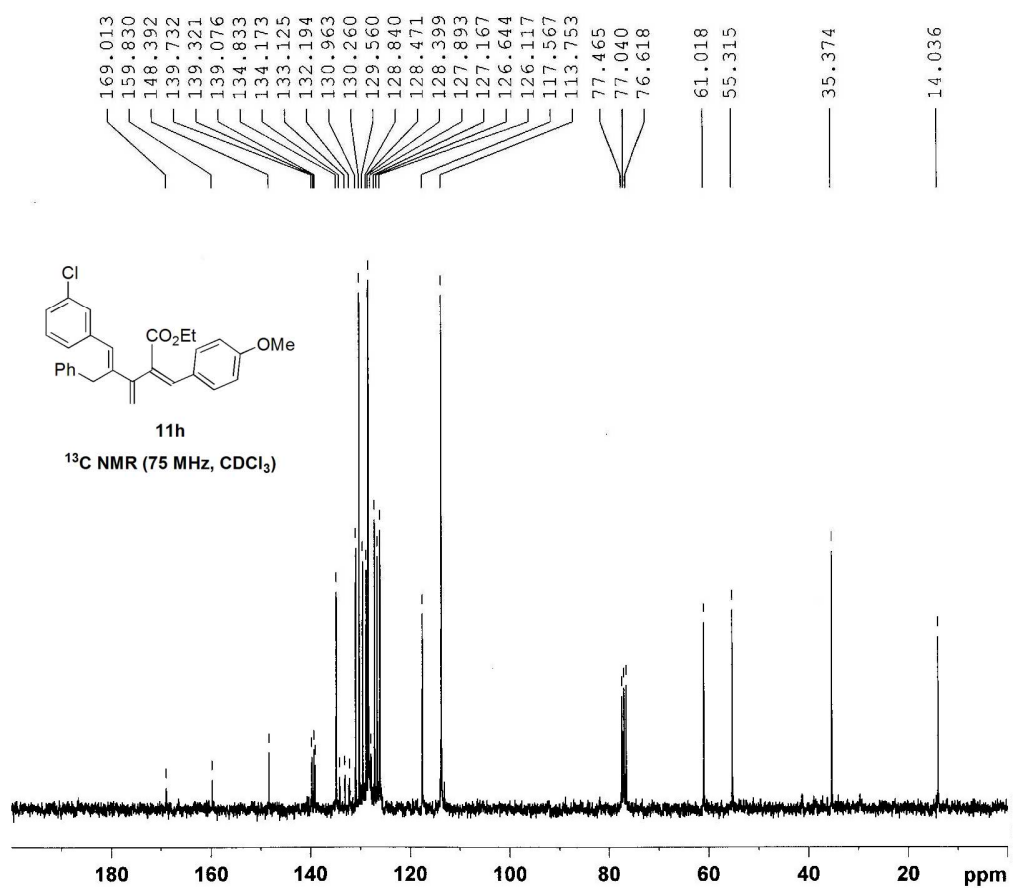

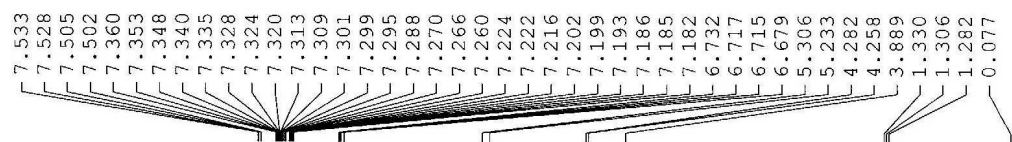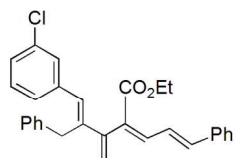

11i

$^1\text{H}$  NMR (300 MHz,  $\text{CDCl}_3$ )

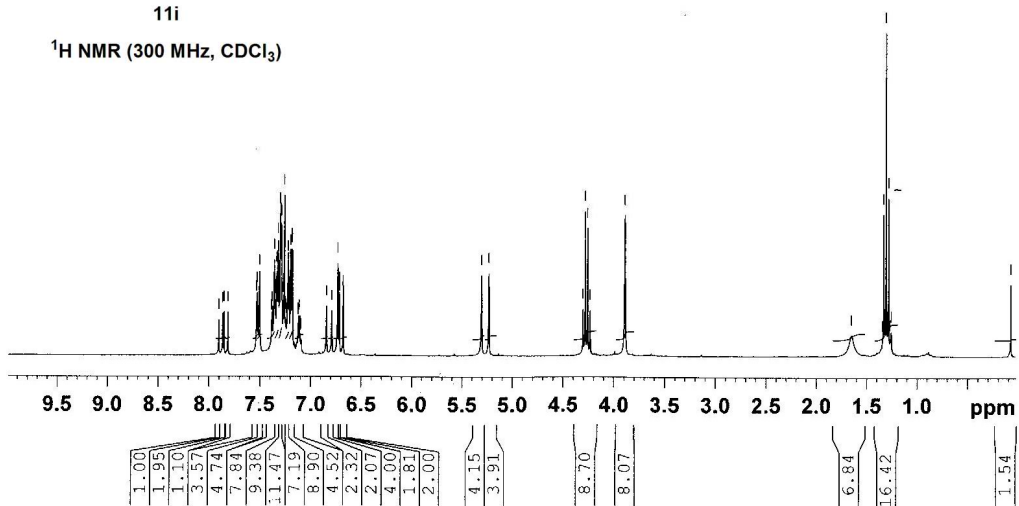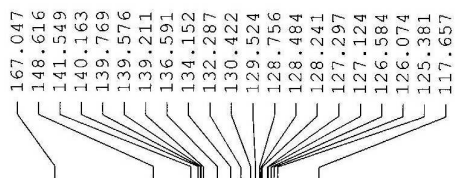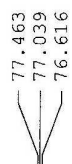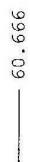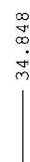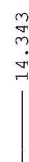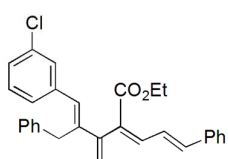

11i

$^{13}\text{C}$  NMR (75 MHz,  $\text{CDCl}_3$ )

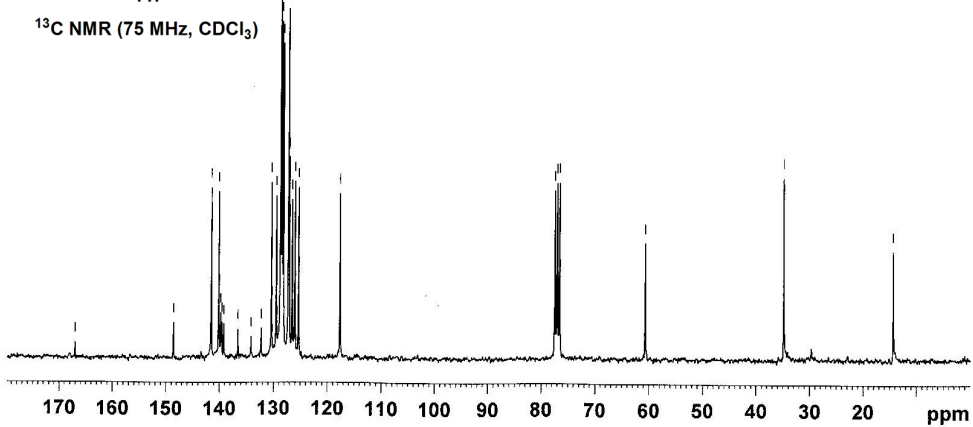

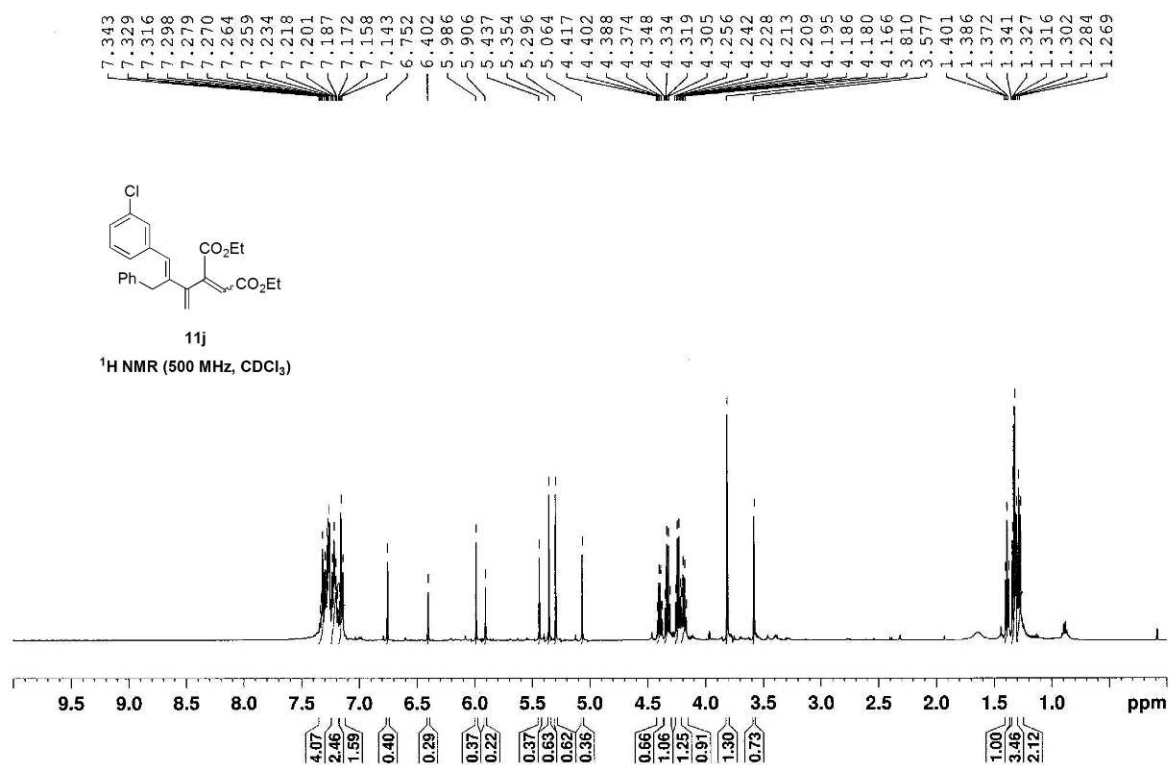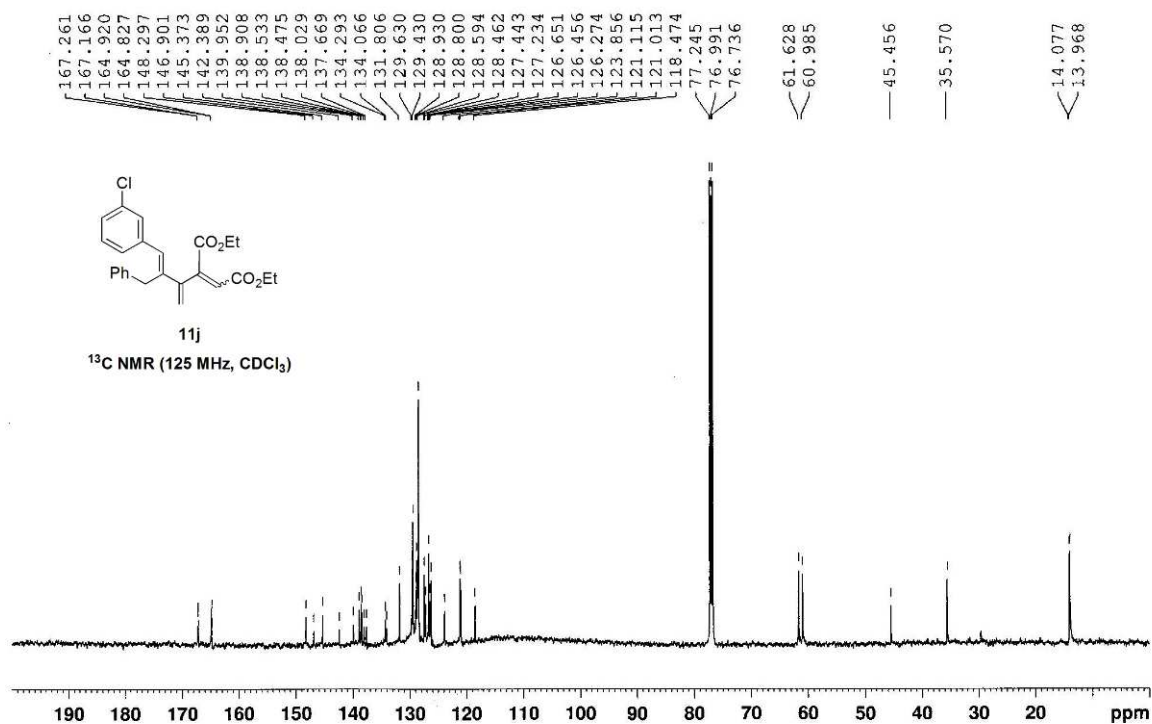

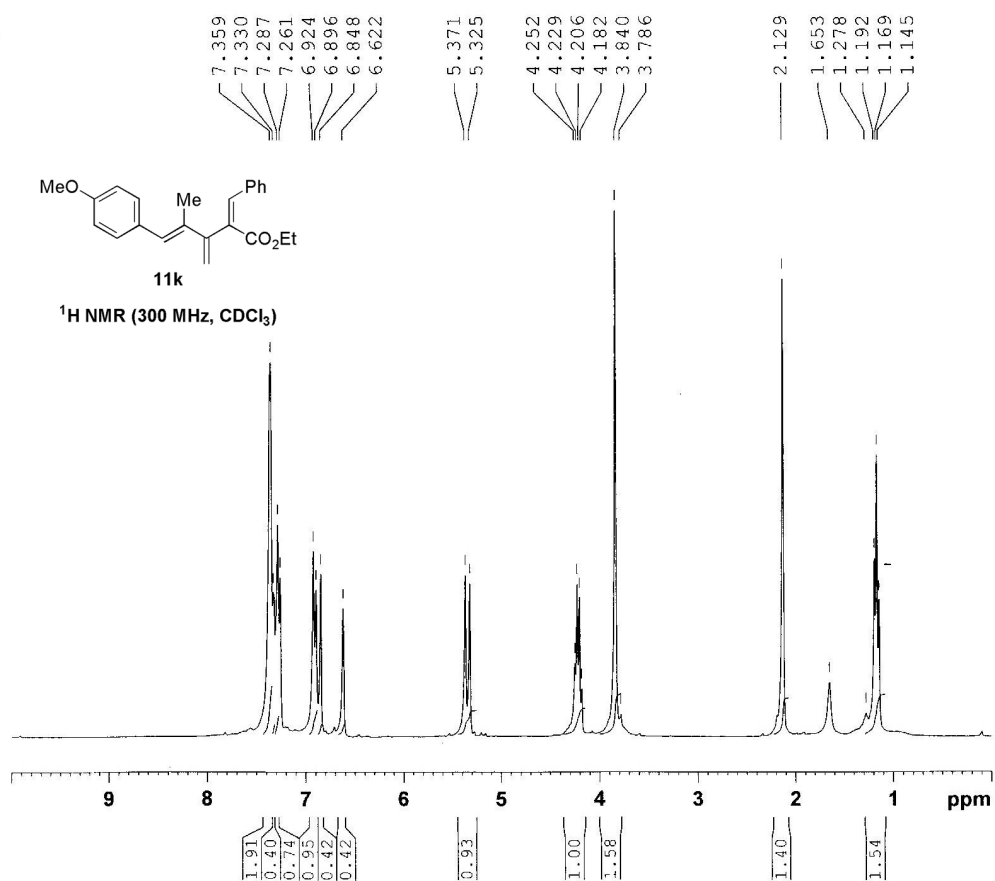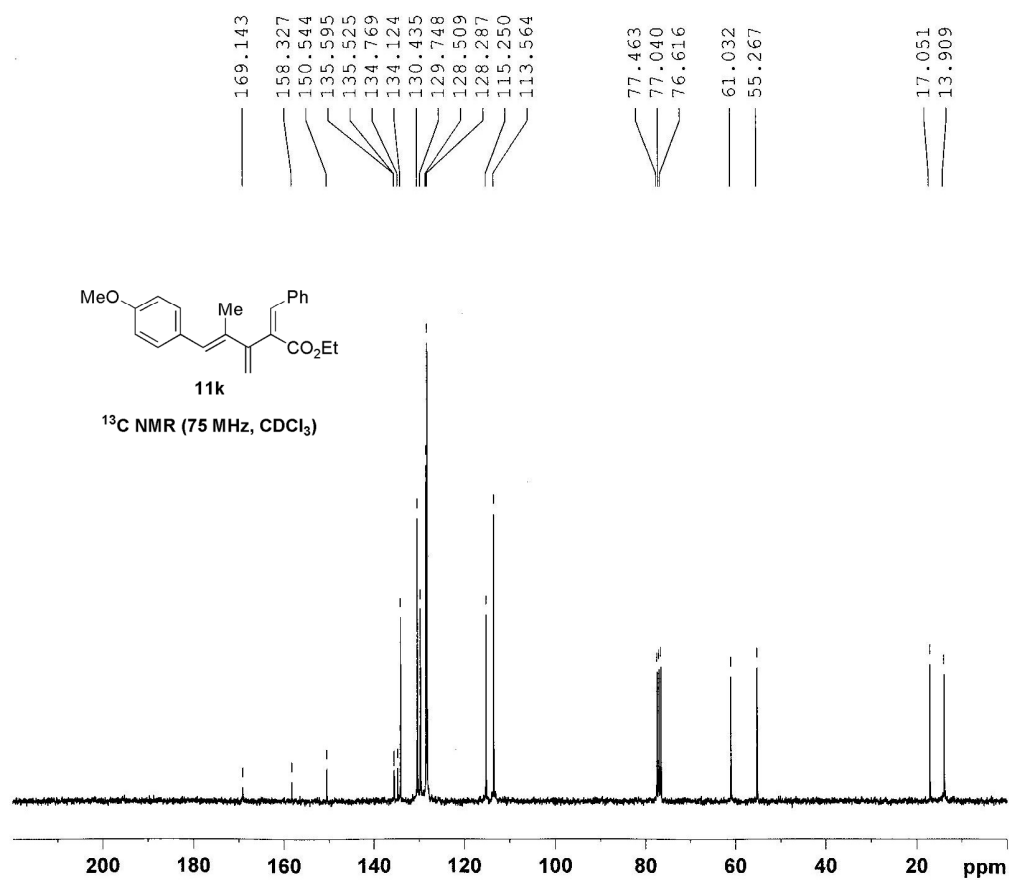

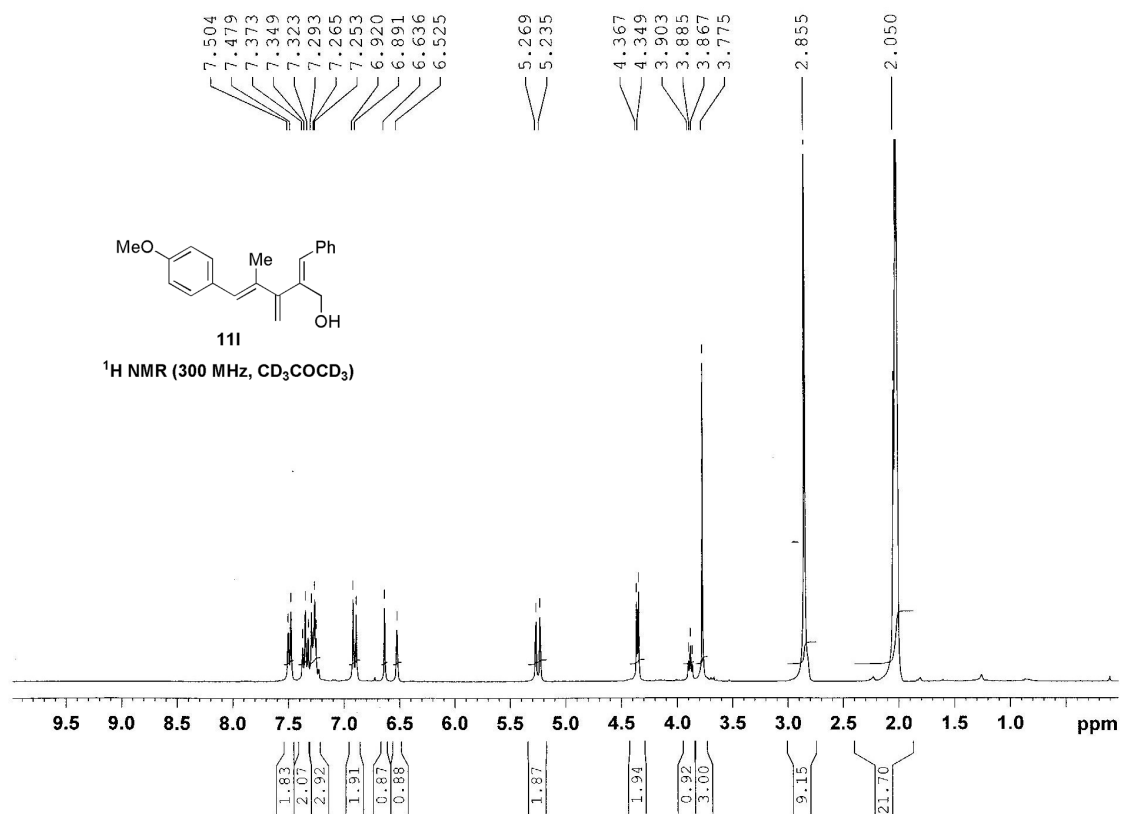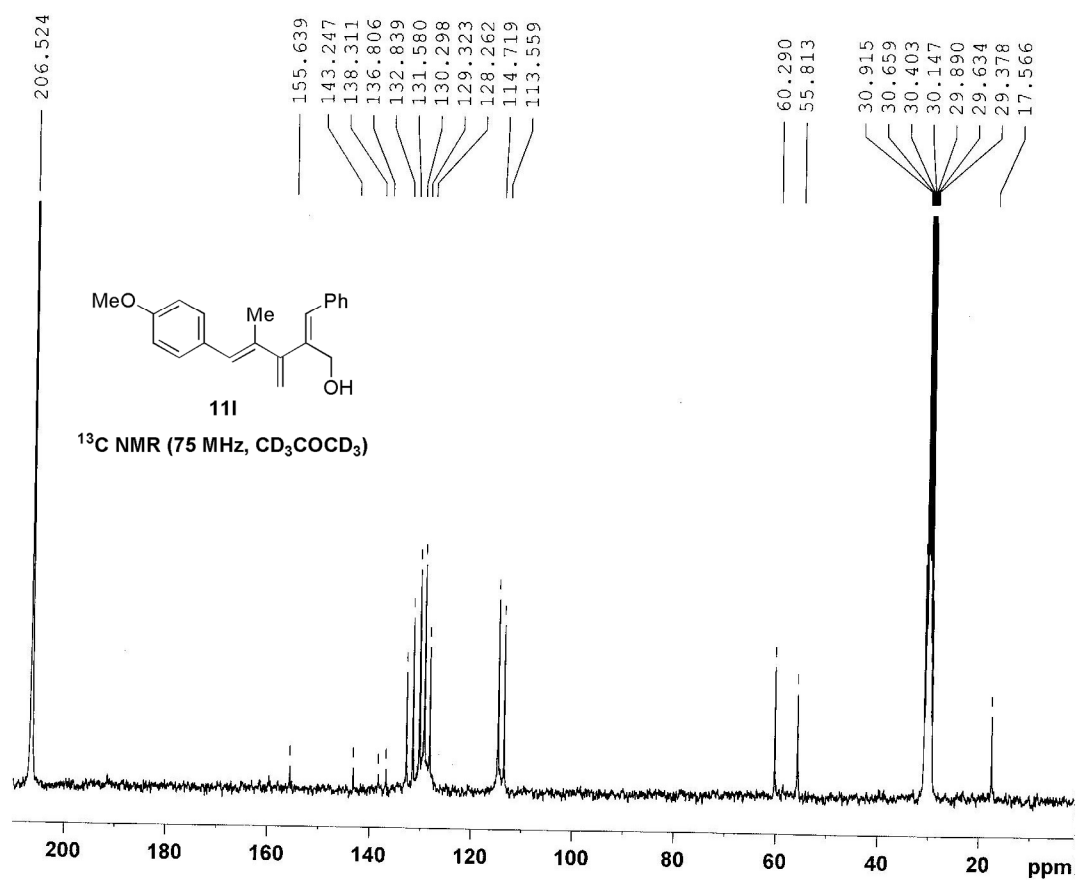

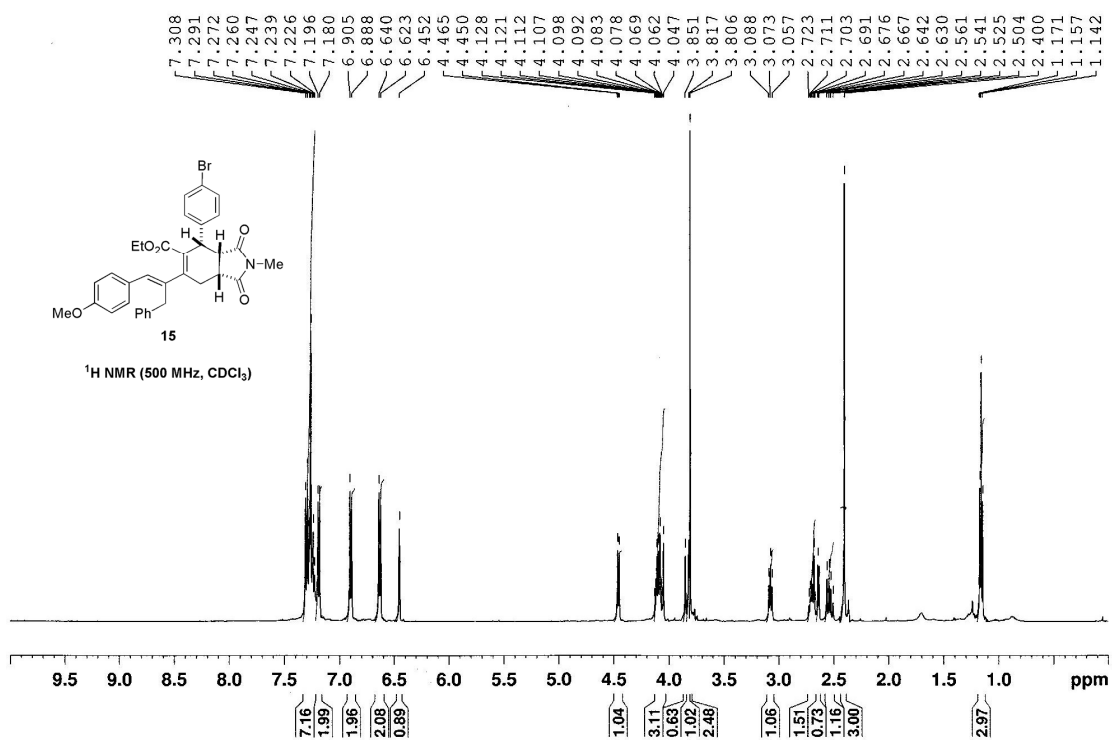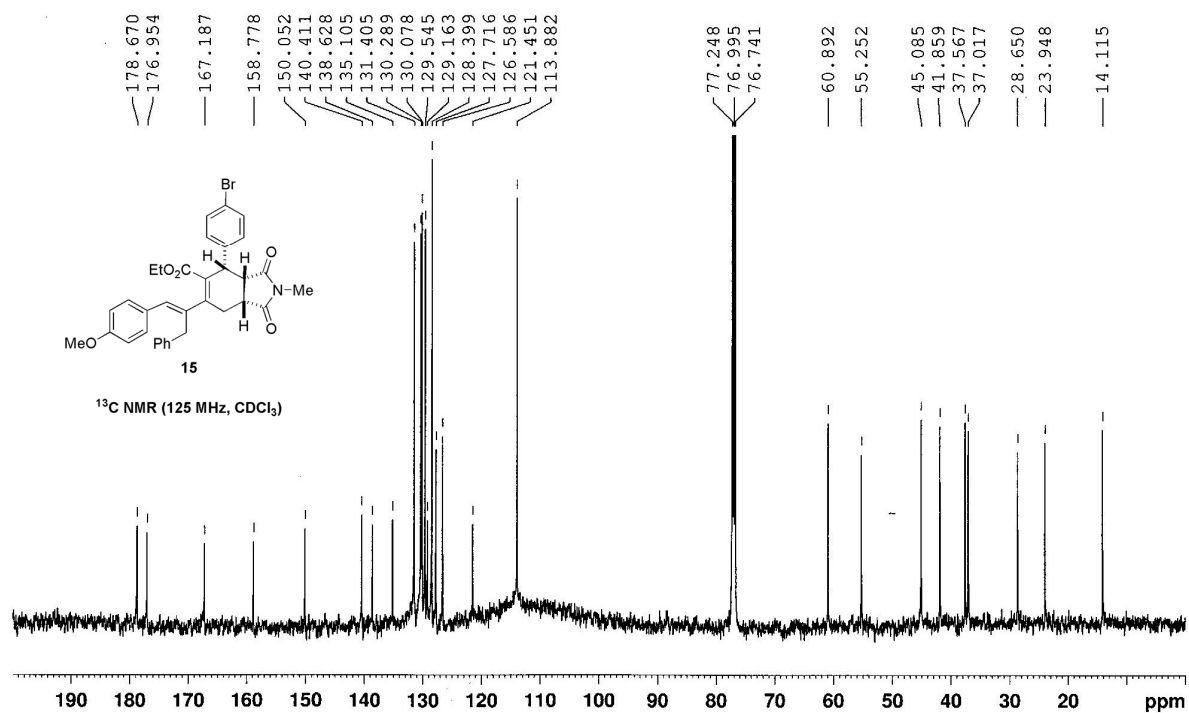

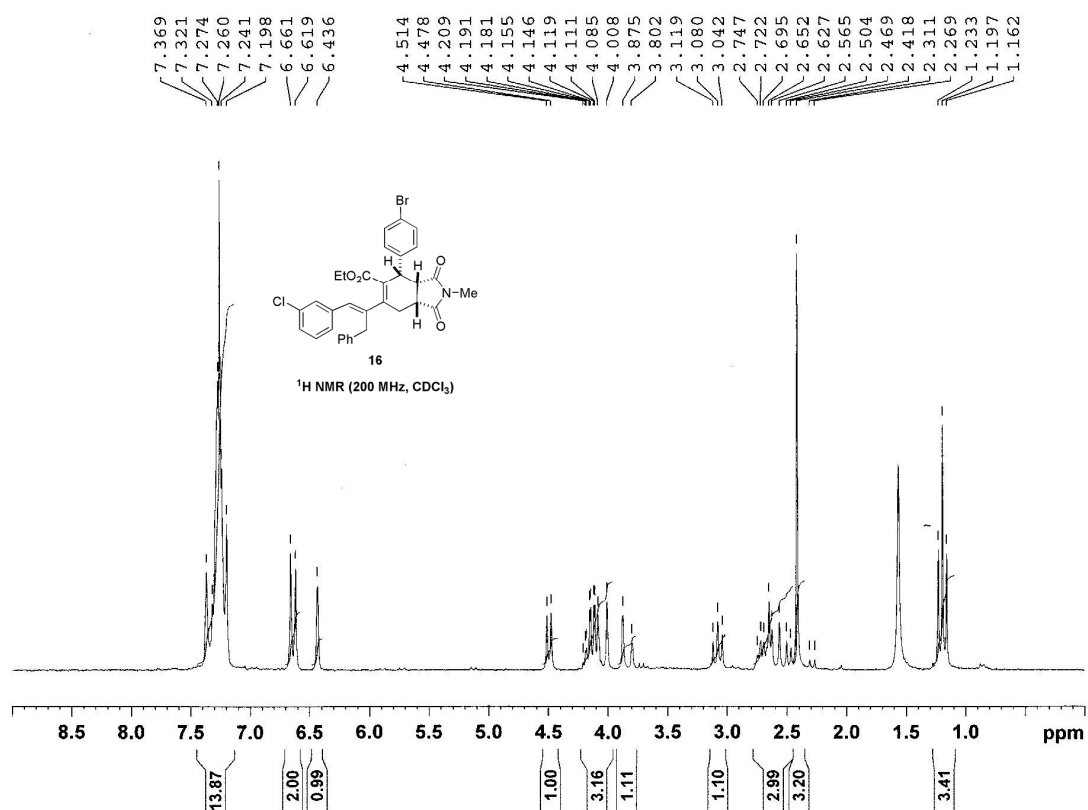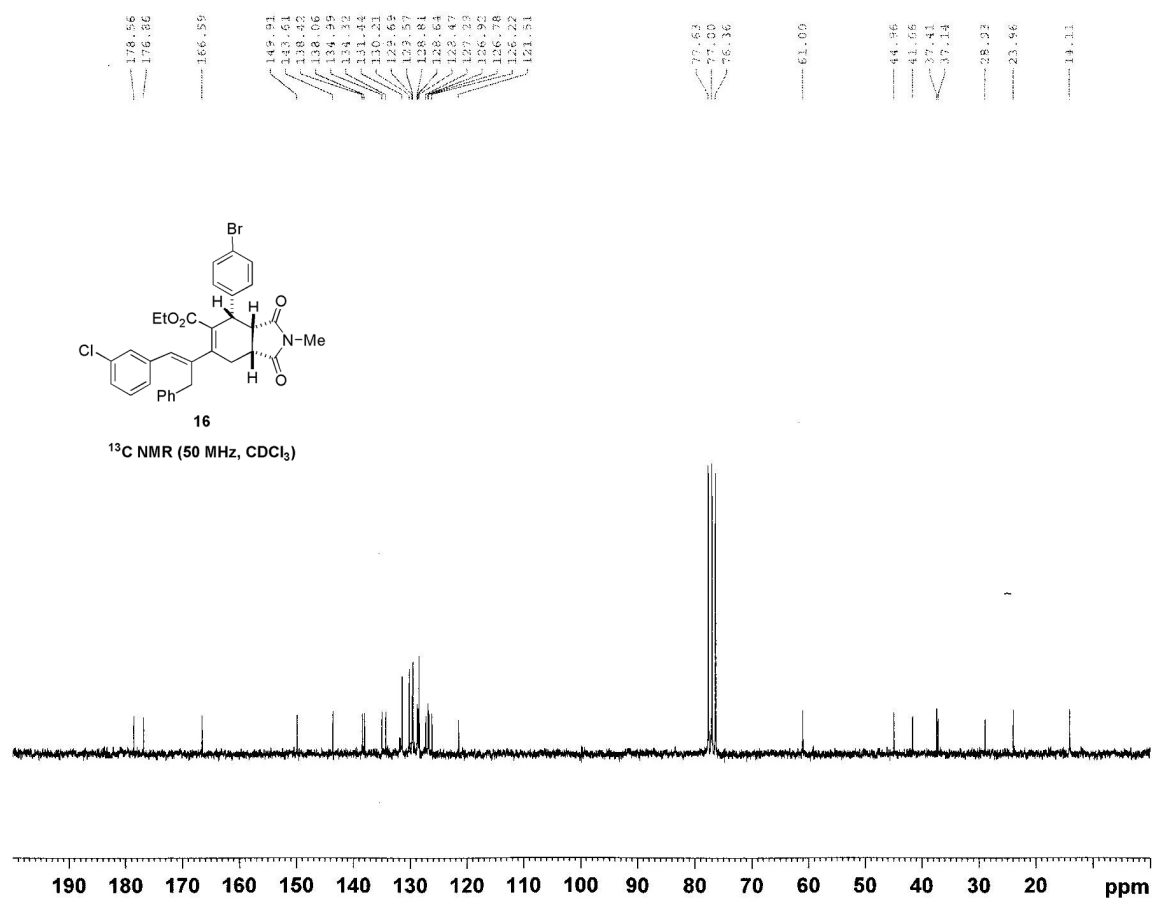

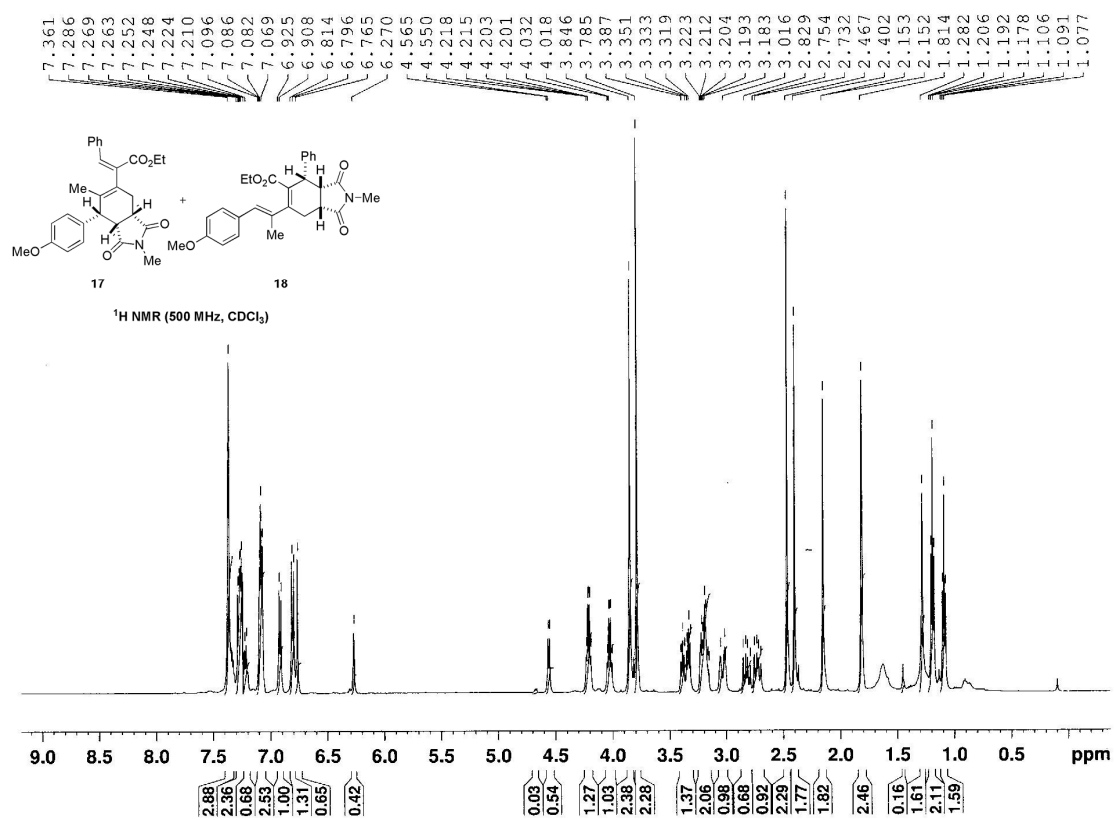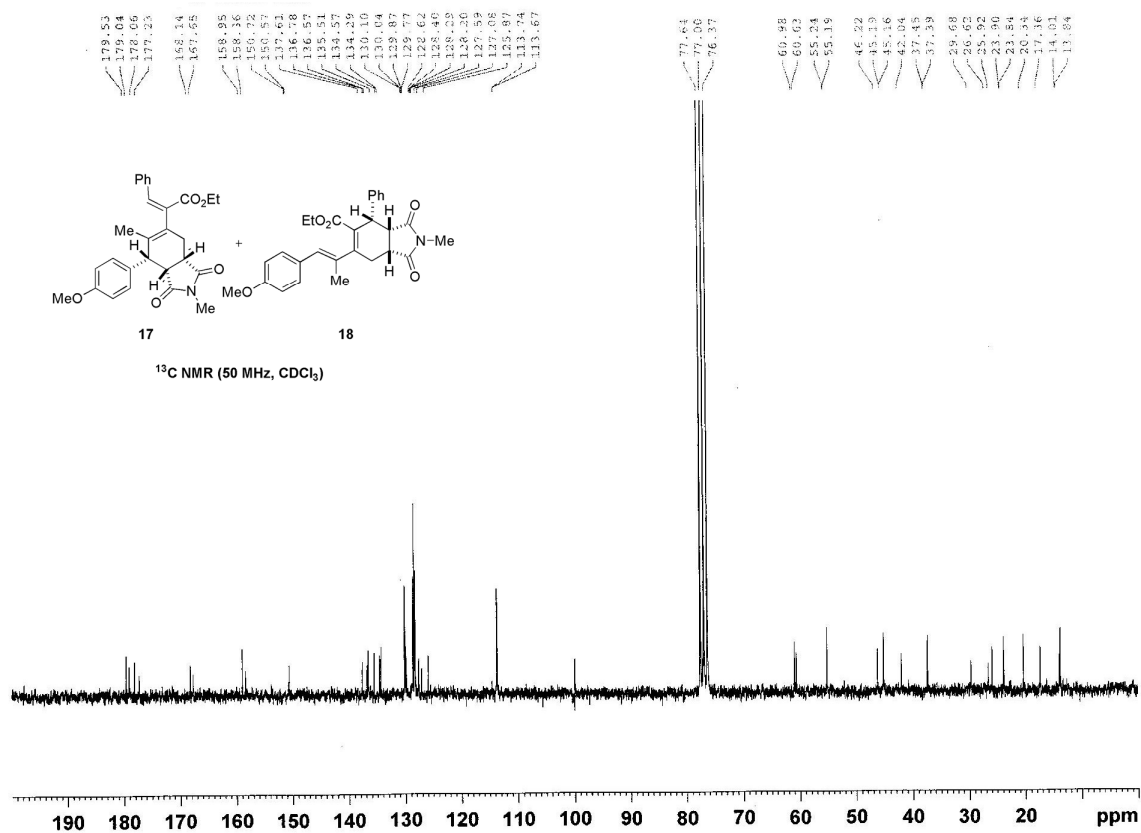



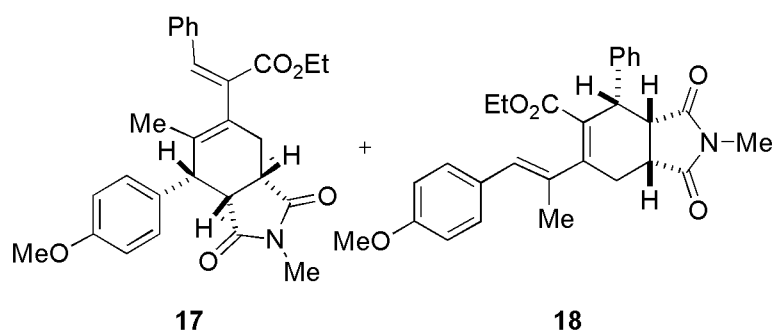

<sup>1</sup>H/<sup>1</sup>H COSY (500 MHz, CDCl<sub>3</sub>)

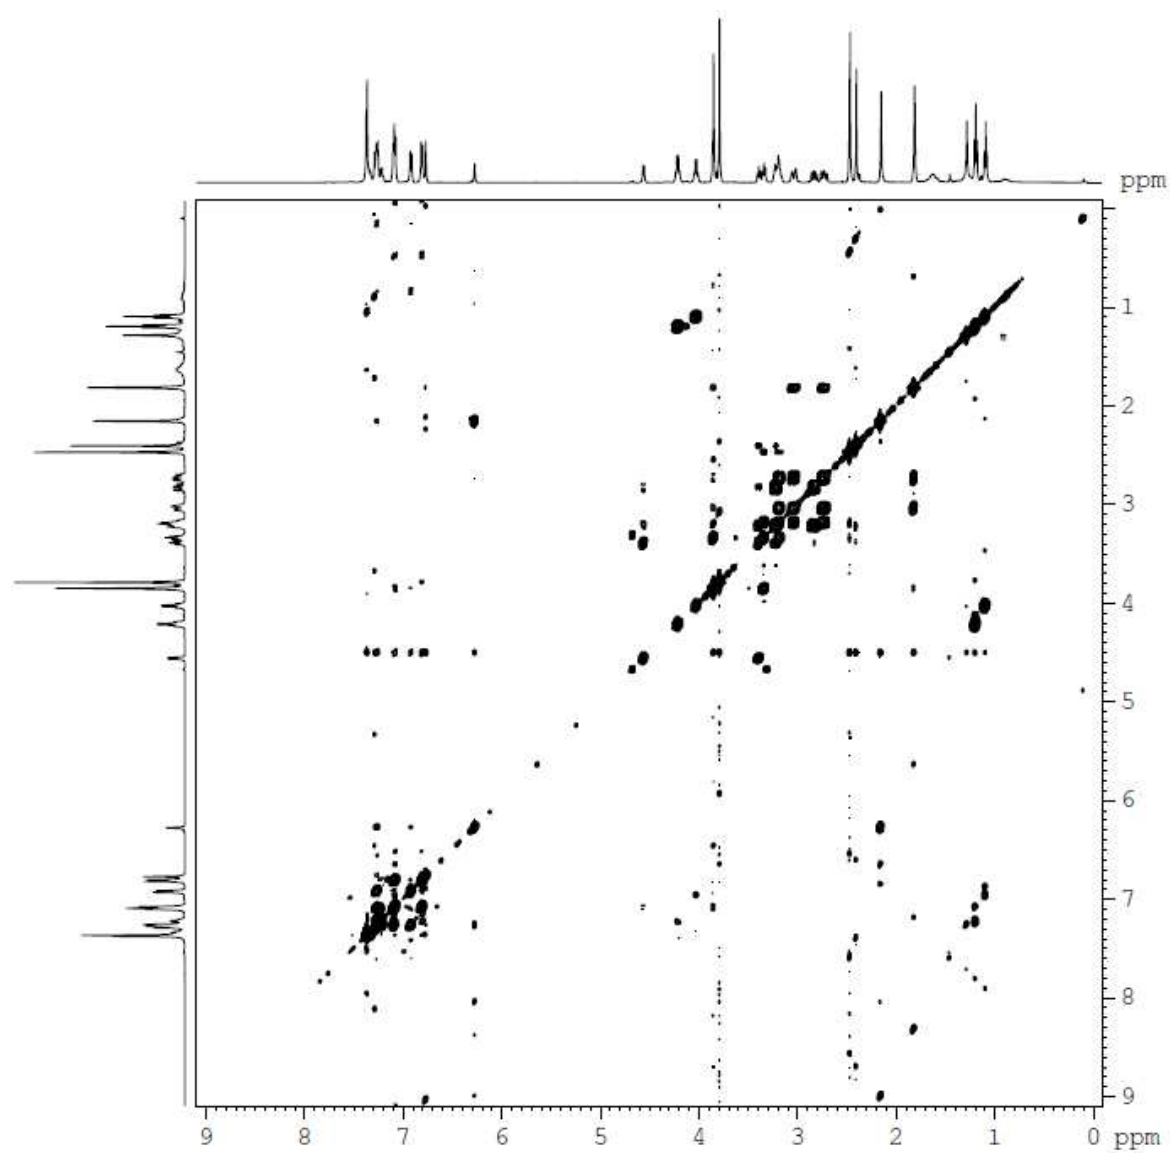

Expansions of  $^1\text{H}/^1\text{H}$  COSY spectrum for the interpretation of peaks of **17**

Unmarked peaks belong to the other regioisomer **18**

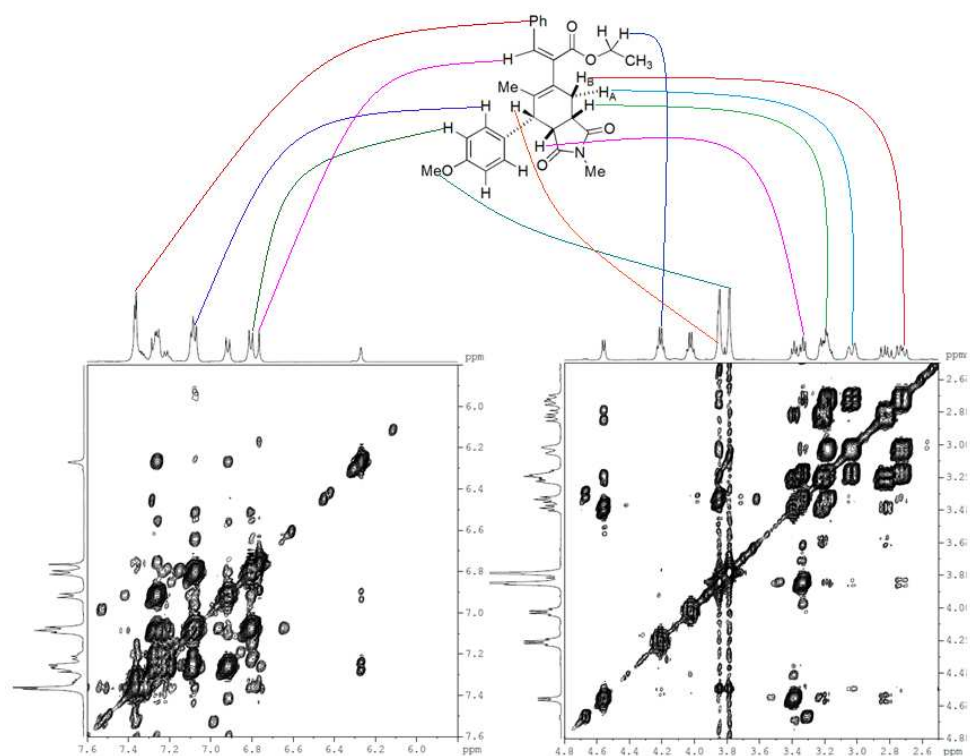

Expansions of  $^1\text{H}/^1\text{H}$  COSY spectrum for the interpretation of peaks of **18**

Unmarked peaks belong to the other regioisomer **17**

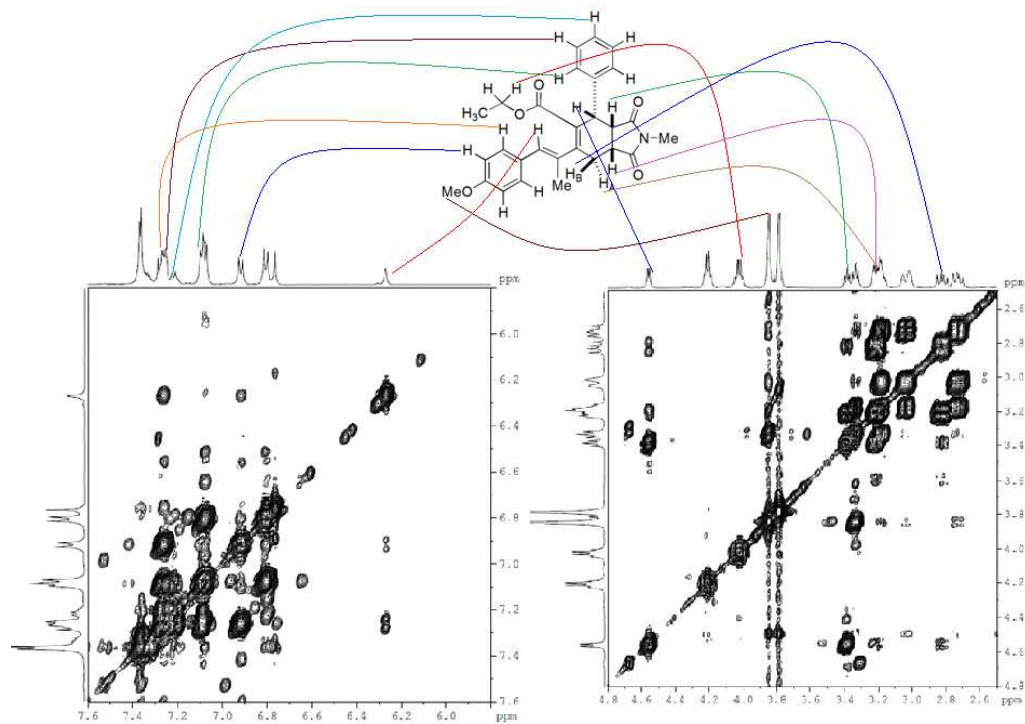

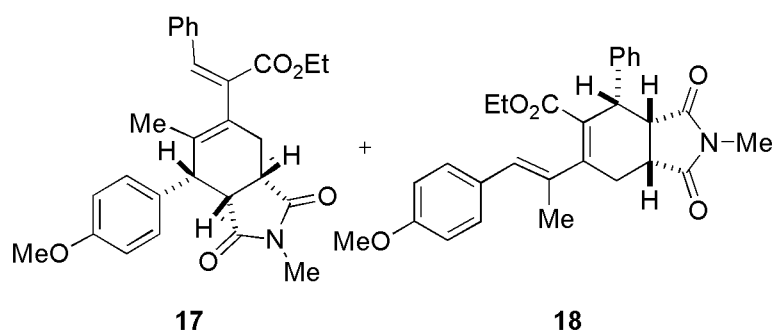

<sup>1</sup>H/<sup>1</sup>H ROESY (500 MHz, CDCl<sub>3</sub>)

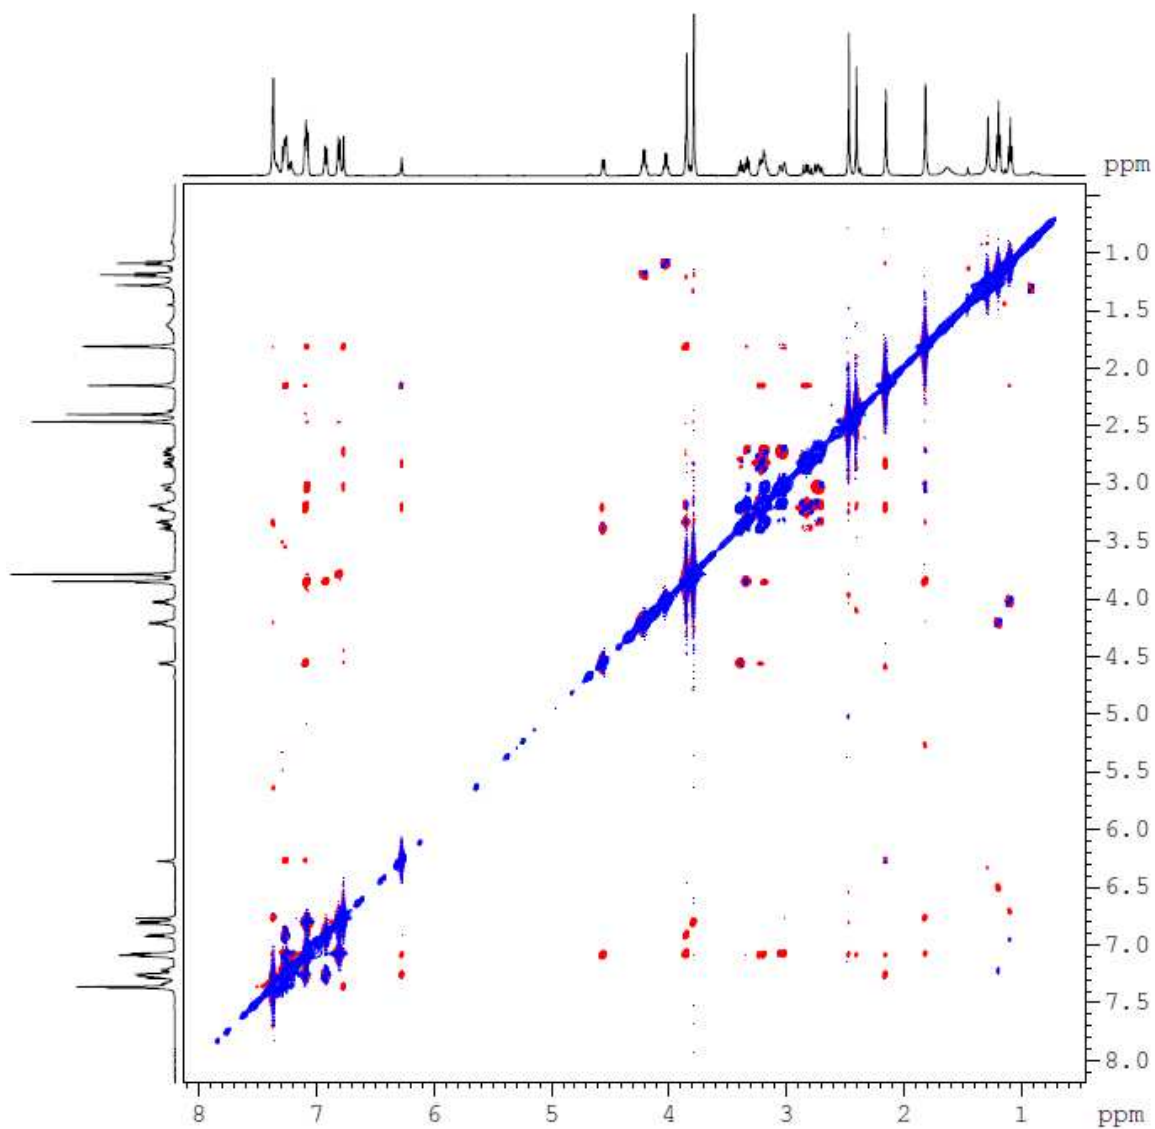

Expansions of  $^1\text{H}/^1\text{H}$  ROESY for the assignment of stereo and regiochemistry **17**

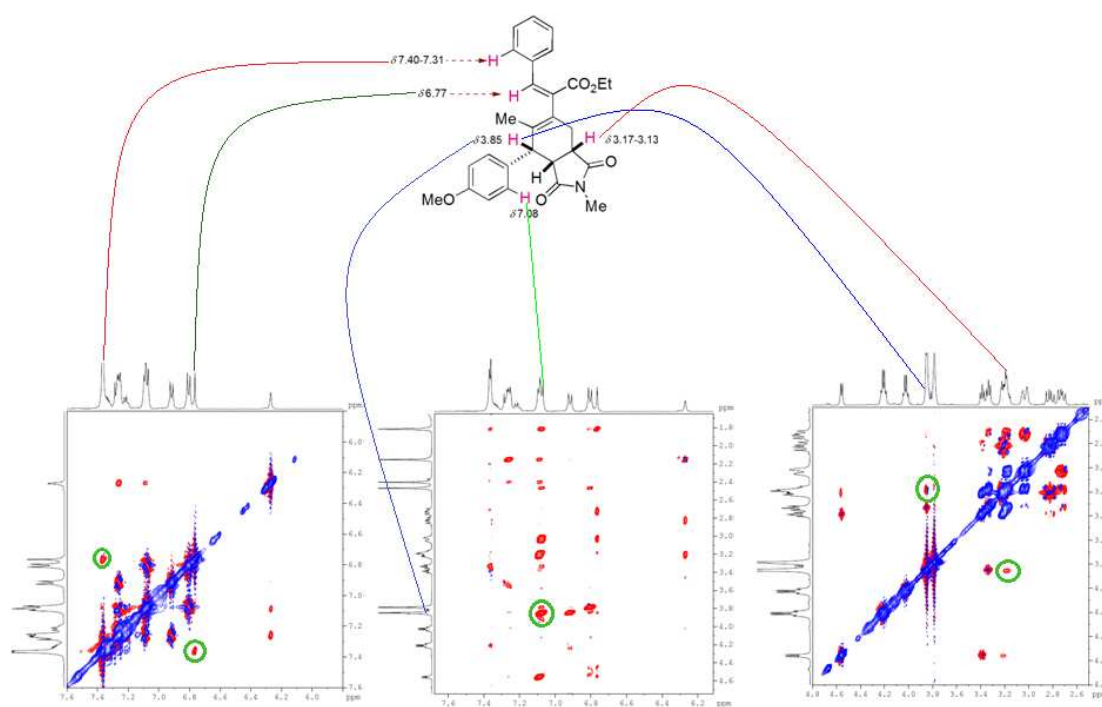

Expansions of  $^1\text{H}/^1\text{H}$  ROESY for the assignment of stereo and regiochemistry of **18**

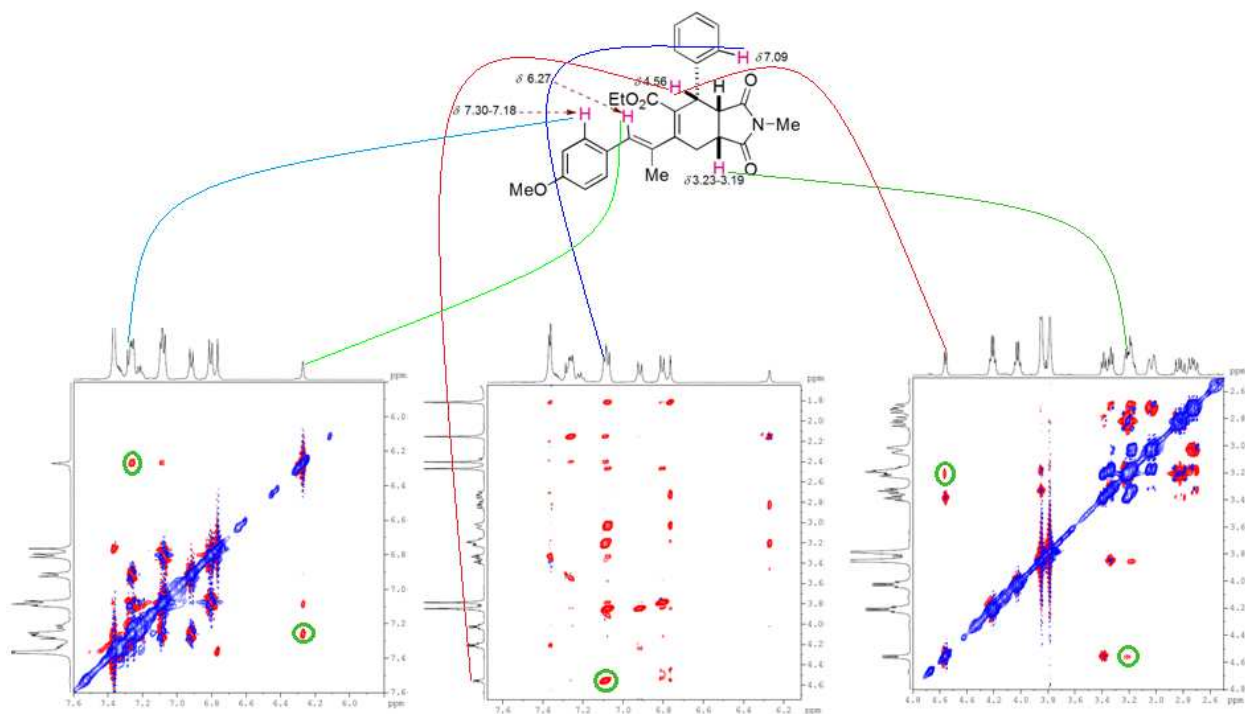

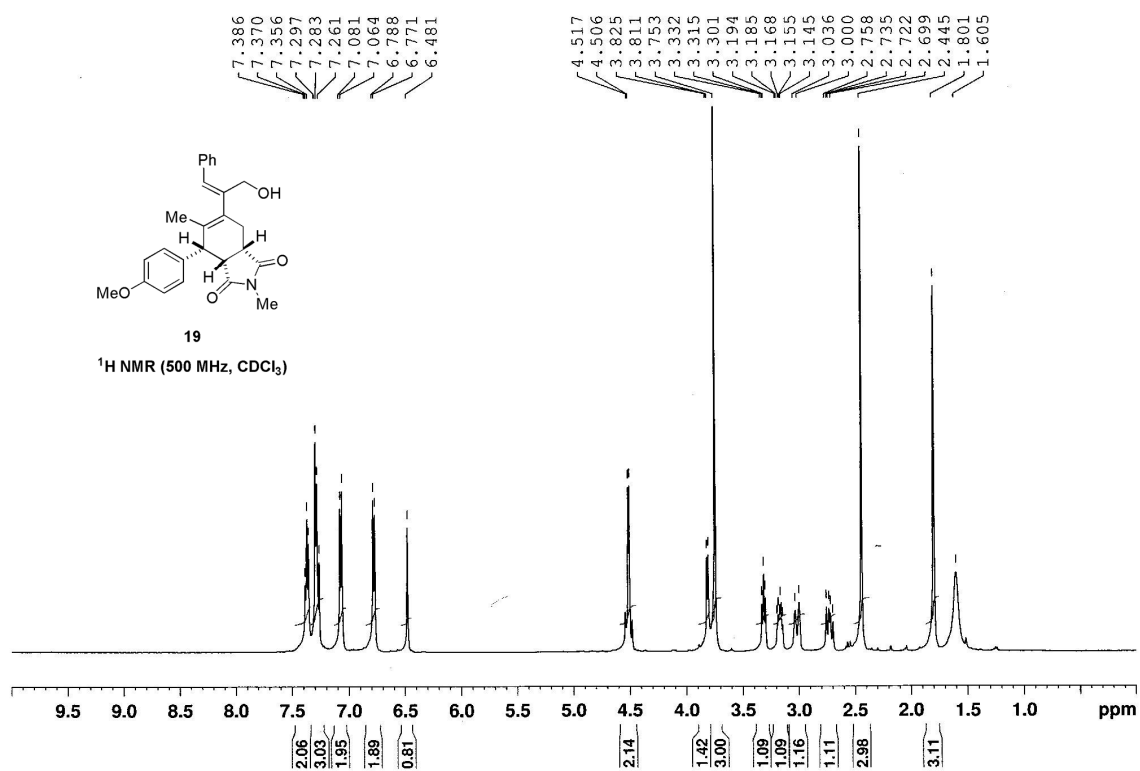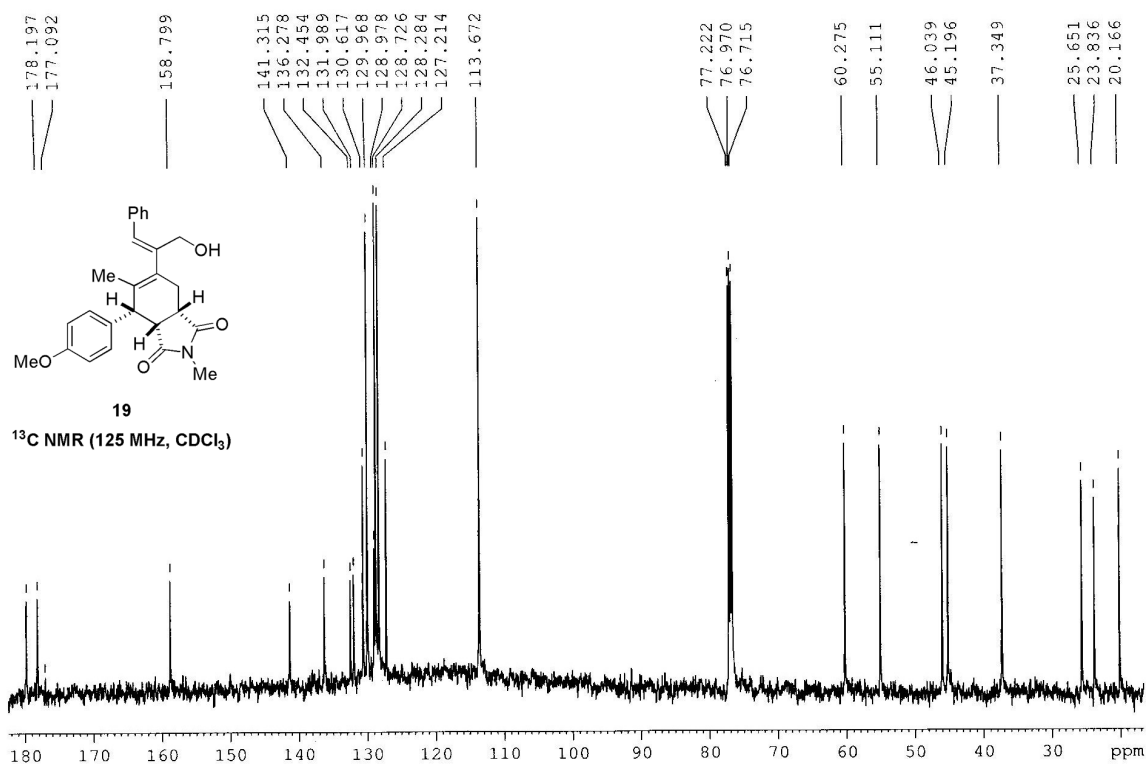

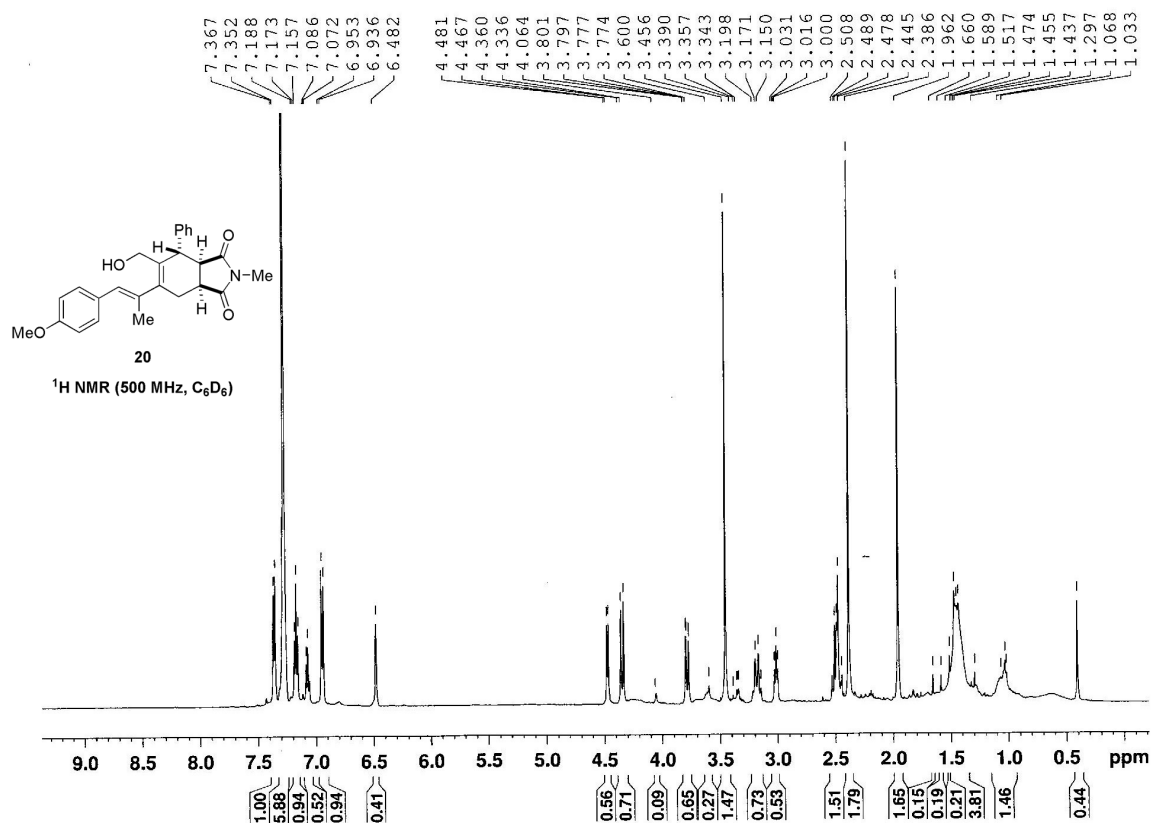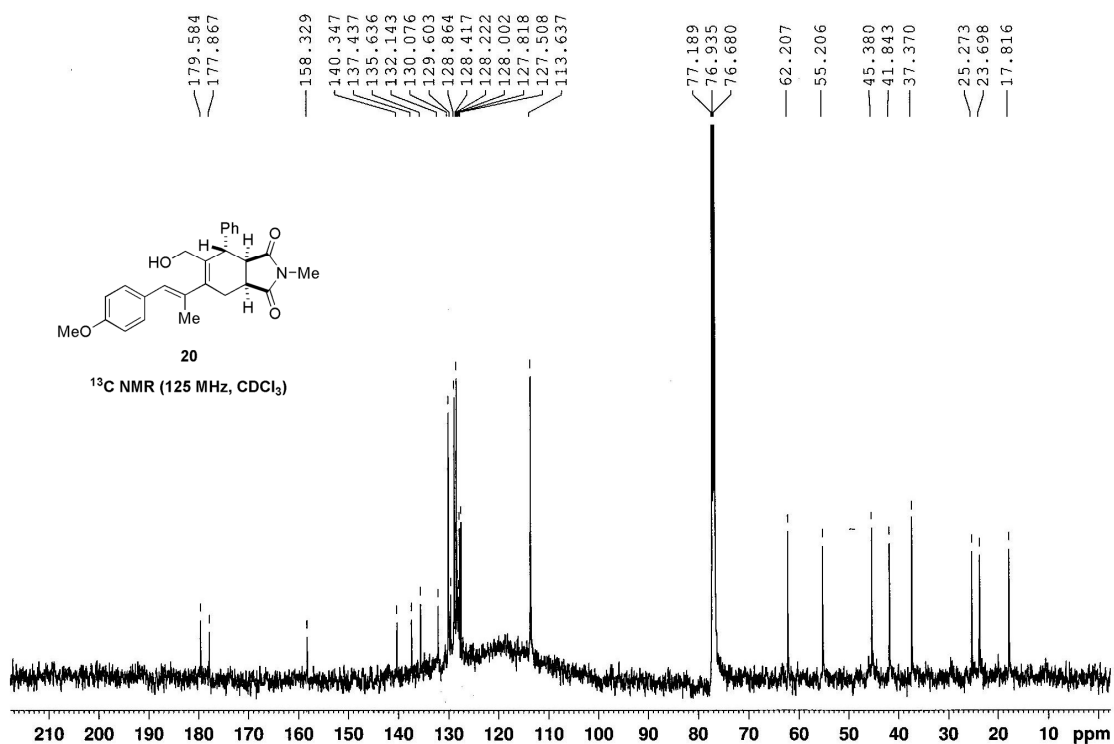

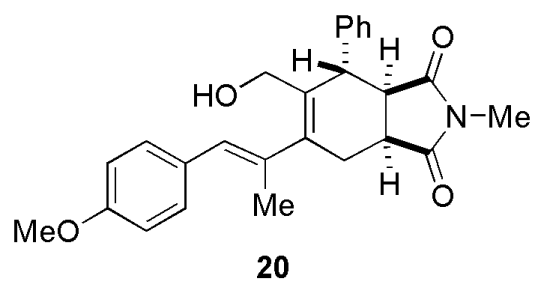

$^1\text{H}/^1\text{H}$  COSY (500 MHz,  $\text{C}_6\text{D}_6$ )

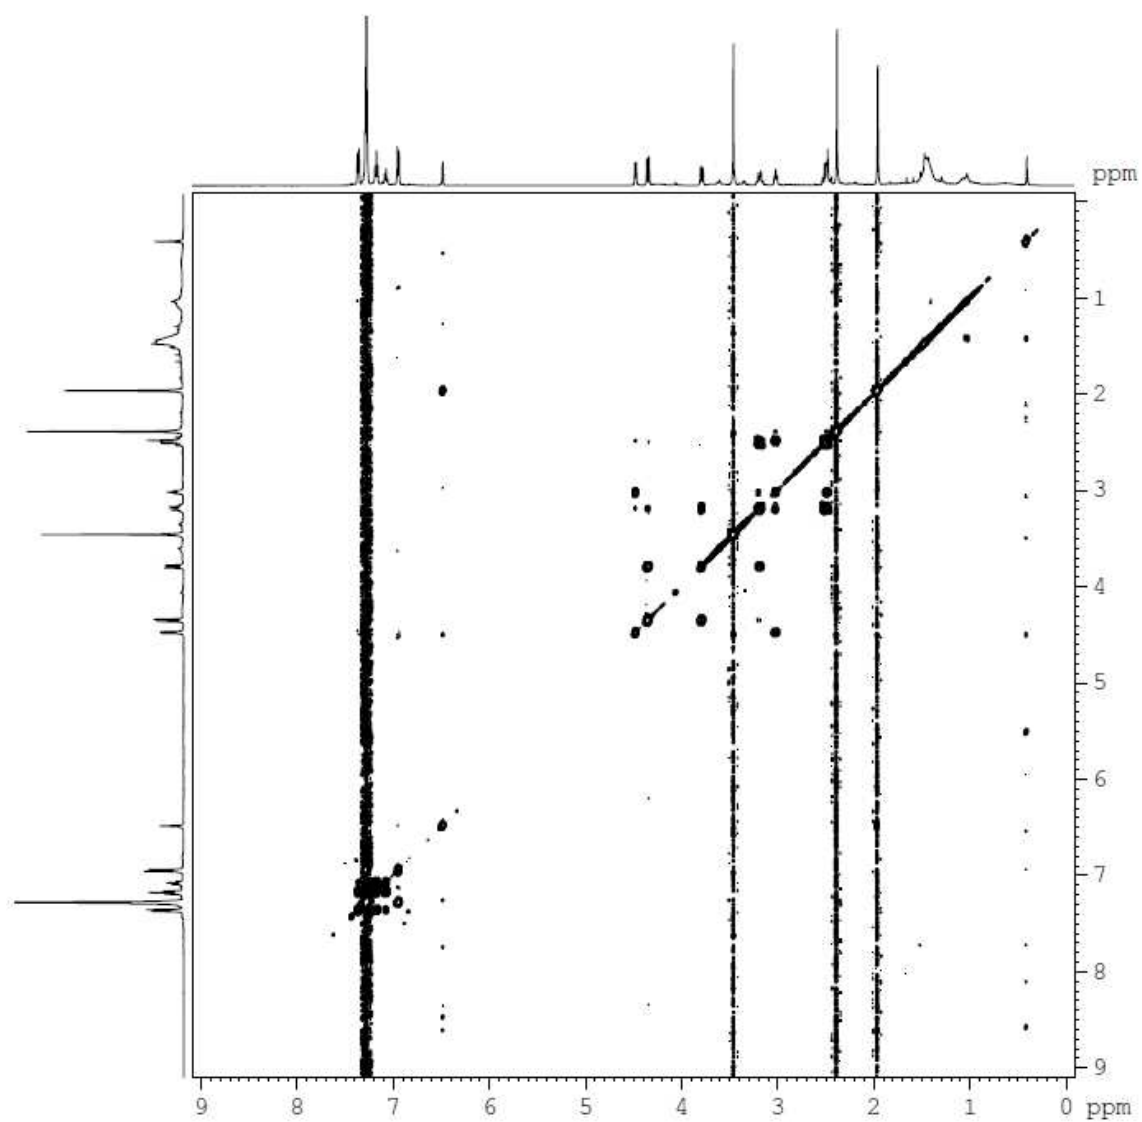

Expansions of  $^1\text{H}/^1\text{H}$  COSY spectrum for the interpretation of peaks of **20**

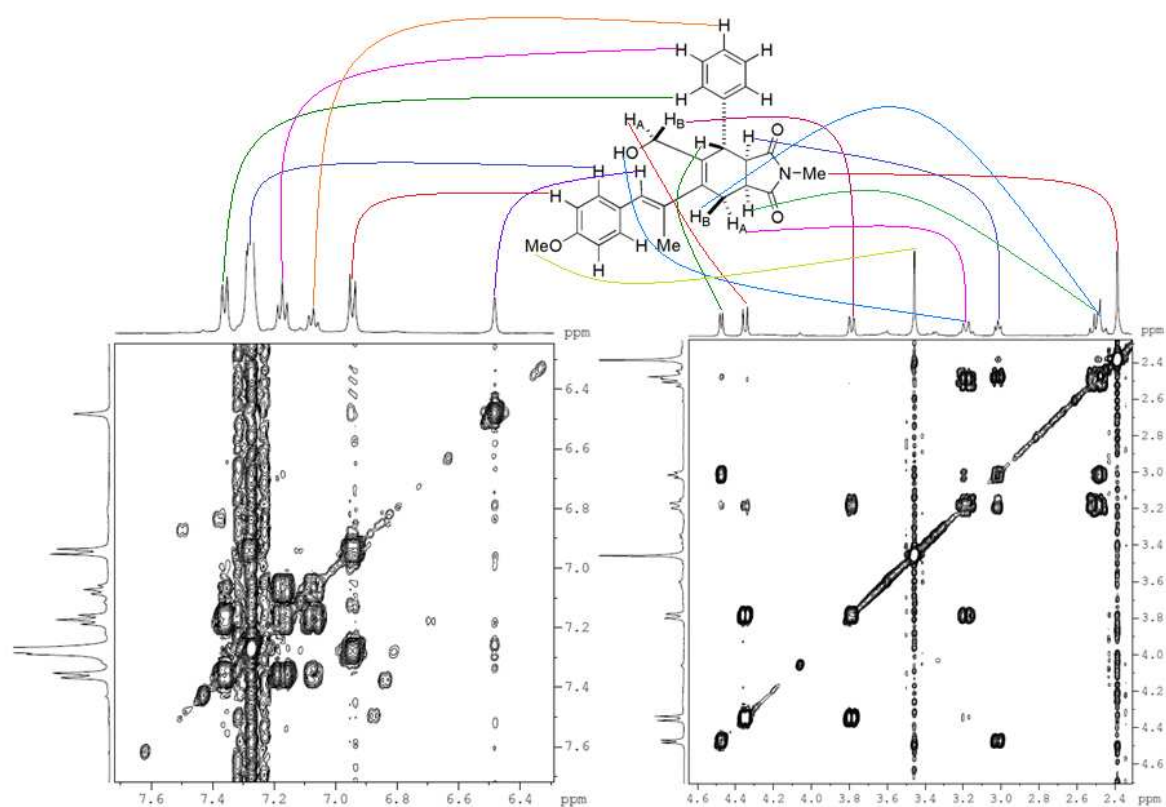



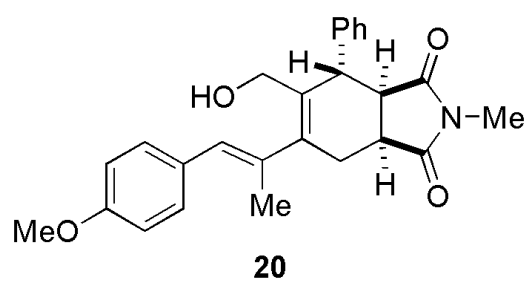

$^1\text{H}/^1\text{H}$  ROESY (500 MHz,  $\text{C}_6\text{D}_6$ )

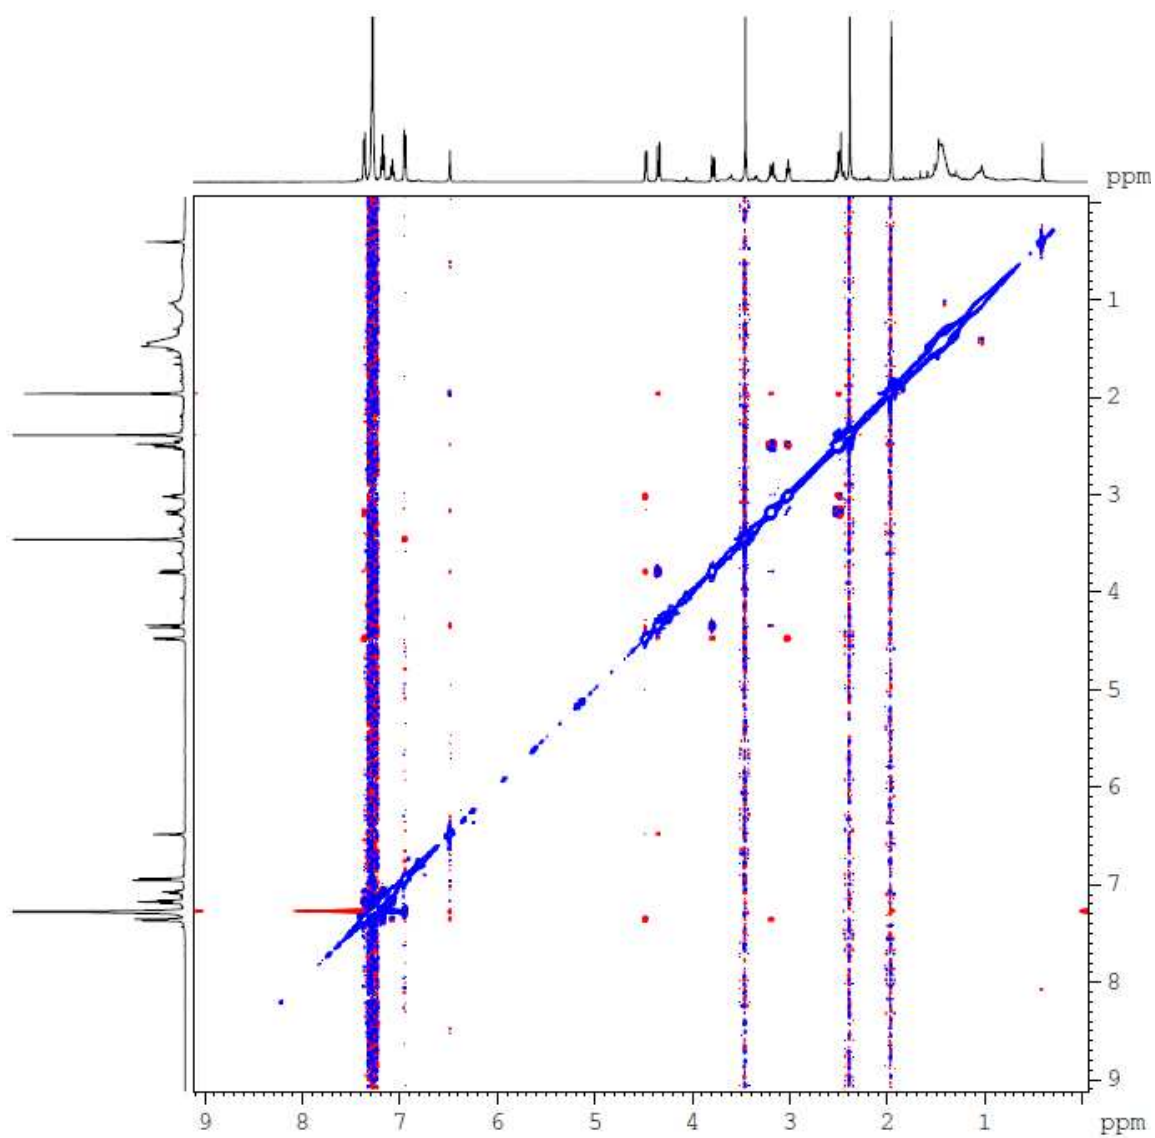

Expansions of  $^1\text{H}/^1\text{H}$  ROESY for the assignment of stereo and regiochemistry of **20**

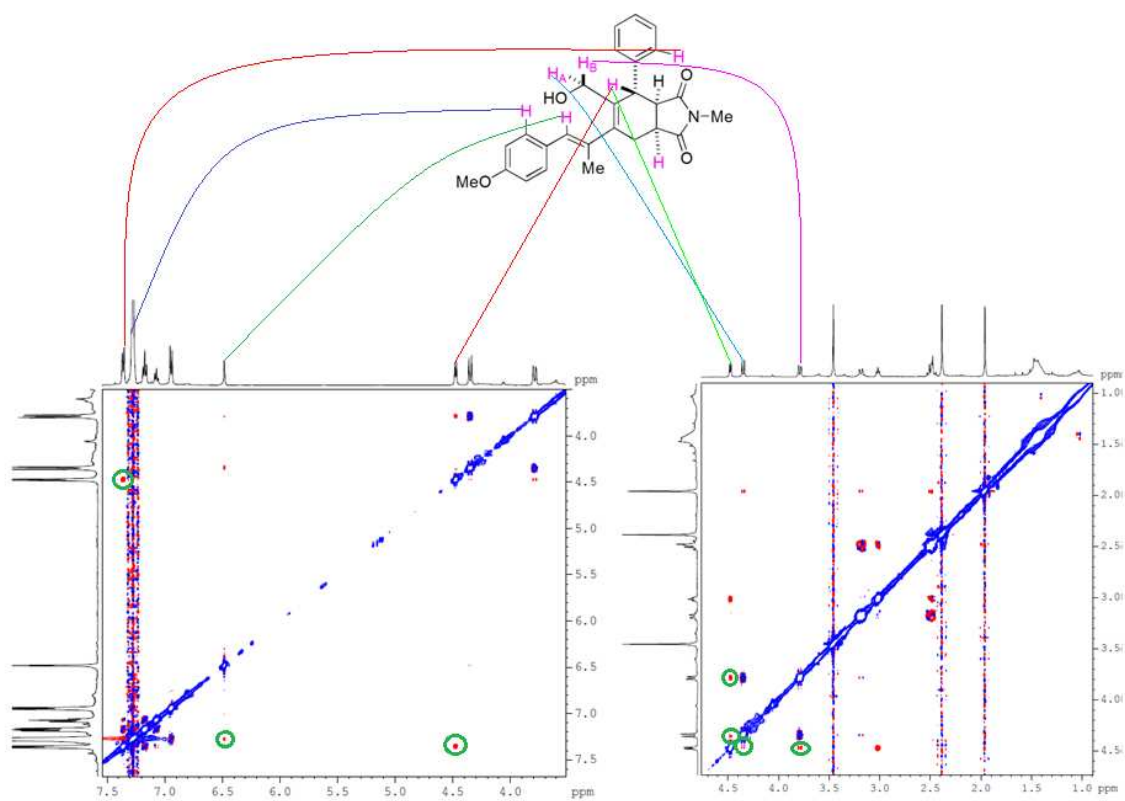

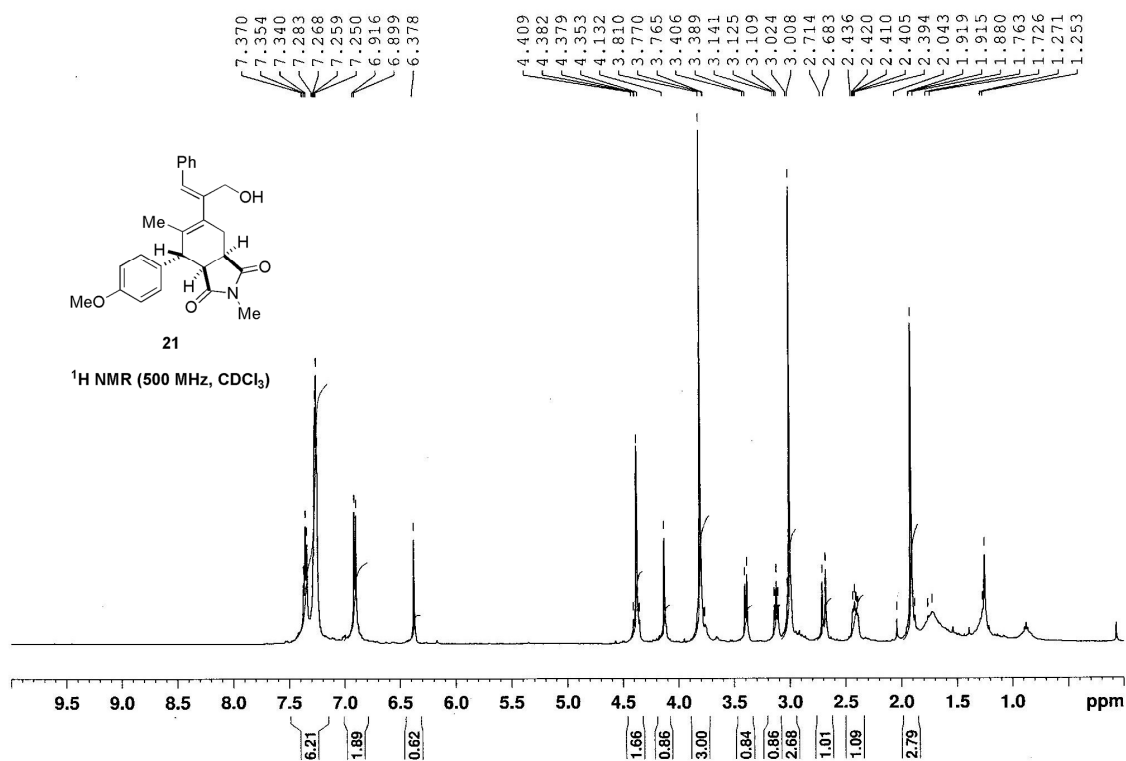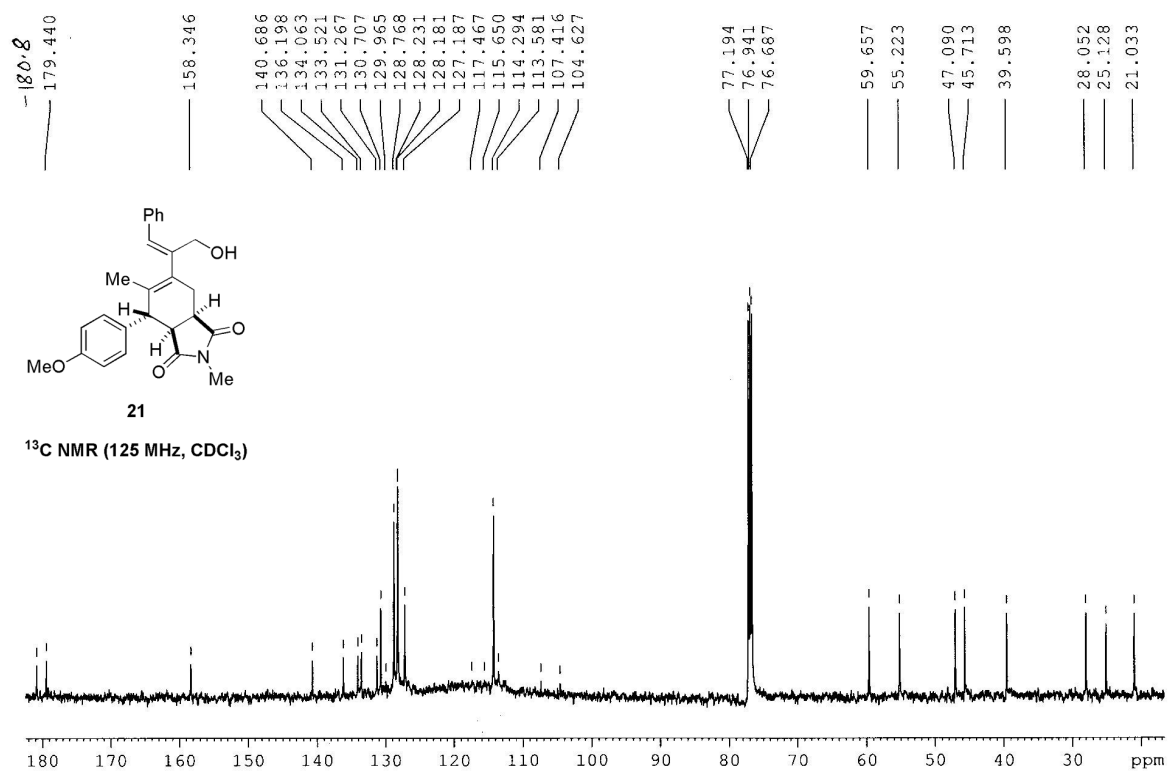

Supplement: c6ra01729k1.pdf [file c6ra01729k1.pdf]
